# Supplementary material for: Revealing intrinsic spin coupling in transition metal-doped graphene
Source: Royal Society of Chemistry journal article supplement (doi:10.1039/d2cp00906d), 2022-01-01
Supplement: d2cp00906d1.pdf [file d2cp00906d1.pdf]

Supplementary Information of

## **Revealing Intrinsic Spin Coupling in Transition Metal-Doped Graphene**

Han Zhou<sup>1</sup>, Xiuli Hu<sup>1</sup>, Wei-Hai Fang<sup>1,2</sup>, and Neil Qiang Su<sup>1\*</sup>

<sup>1</sup> *Department of Chemistry, Key Laboratory of Advanced Energy Materials Chemistry (Ministry of Education) and Renewable Energy Conversion and Storage Center (RECAST), Nankai University, Tianjin 300071, China;*

<sup>2</sup> *Key Laboratory of Theoretical and Computational Photochemistry, Ministry of Education, College of Chemistry, Bei-jing Normal University, Beijing 100875, China*

\*E-mail: [nqsu@nankai.edu.cn](mailto:nqsu@nankai.edu.cn)

(Dated: Jan 25, 2022)

## Supplementary Figures

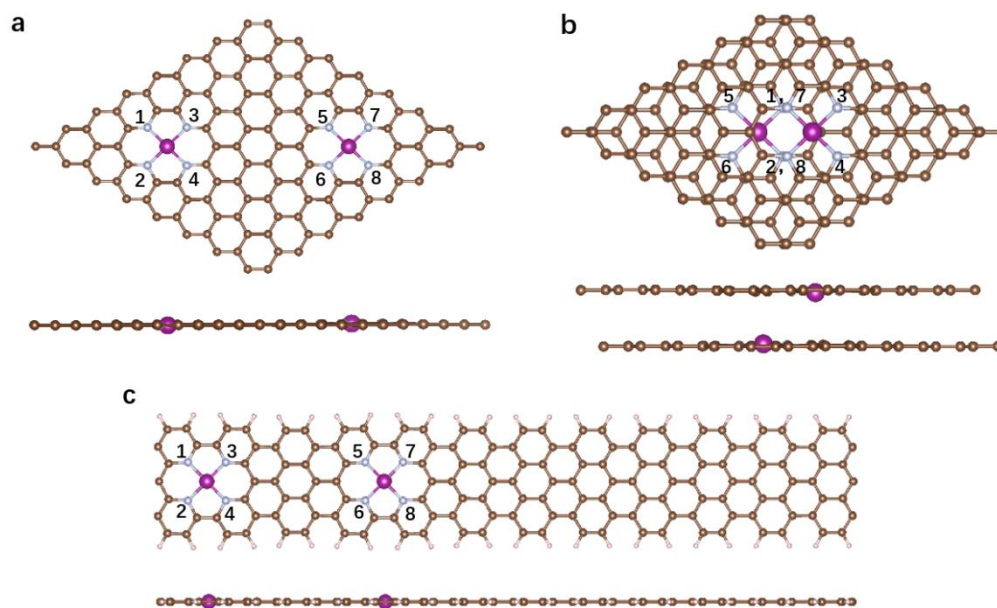

Figure S1. Top and side representations of (a)  $\text{TMN}_4\text{-TMN}_4$  (b) double-layer  $\text{TMN}_4\text{-TMN}_4$  and (c)  $\text{TMN}_4\text{-TMN}_4$  in GNR. The numbers 1-8 distinguish the different N atoms. For the overlap of top view in Figure (b), 1 and 2 represent the upper N atoms, and 7 and 8 represent the lower N atoms.

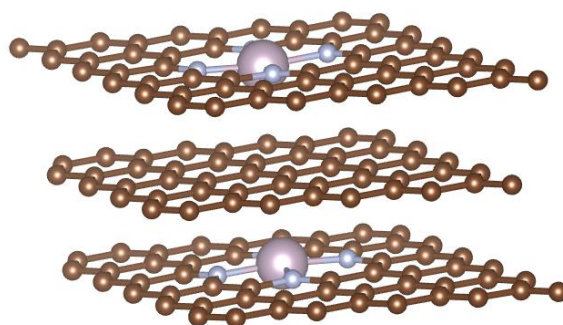

Figure S2. The side representation of triple-layer  $\text{TMN}_4\text{-TMN}_4$ .

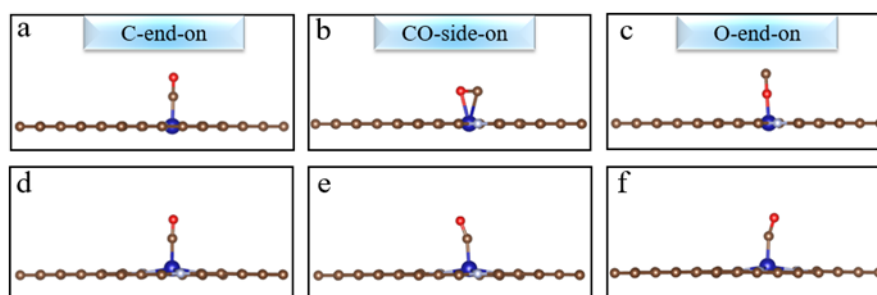

Figure S3. Geometry optimization for the CO adsorption on Co-doped graphene with different initial configurations. (a-c) are different initial orientations of the CO adsorption on  $\text{CoN}_4$  via (a) C-end-on, (b) CO-side-on, and (c) O-end-on patterns. (d-f) are the final optimized structures correspondingly.

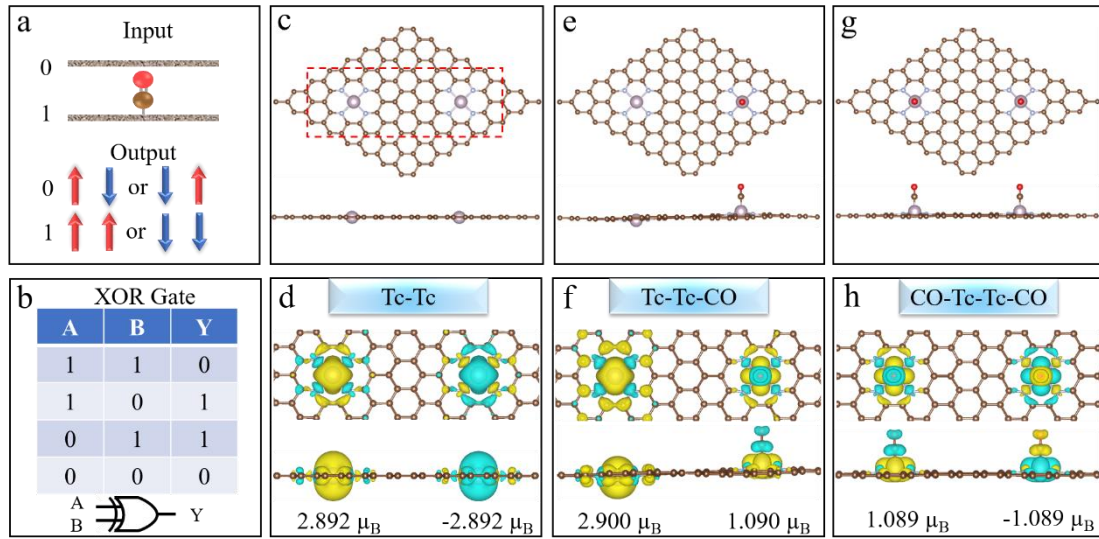

Figure S4. (a) The design of input and output. (b) Truth table and schematic representation of XOR gate. Input A and B are defined as the absence (logic 0) or presence (logic 1) of CO on the two Tc sites. (c), (e), and (g) are top and side views of optimized structures for Tc-Tc, Tc-Tc-CO, and CO-Tc-Tc-CO, respectively. (d), (f) and (h) are the net spin electron densities for Tc-Tc, Tc-Tc-CO, and CO-Tc-Tc-CO at an isosurface value of  $0.001 \text{ e}\text{\AA}^{-3}$ , respectively. The yellow and blue represent positive and negative signs of the spin densities, respectively. Tc-Tc, Tc-Tc-CO, and CO-Tc-Tc-CO represent  $\text{TcN}_4\text{-TcN}_4$ ,  $\text{TcN}_4\text{-TcN}_4$  with the presence of CO on the Tc site, and  $\text{TcN}_4\text{-TcN}_4$  with the presence of COs on two Tc sites, respectively.

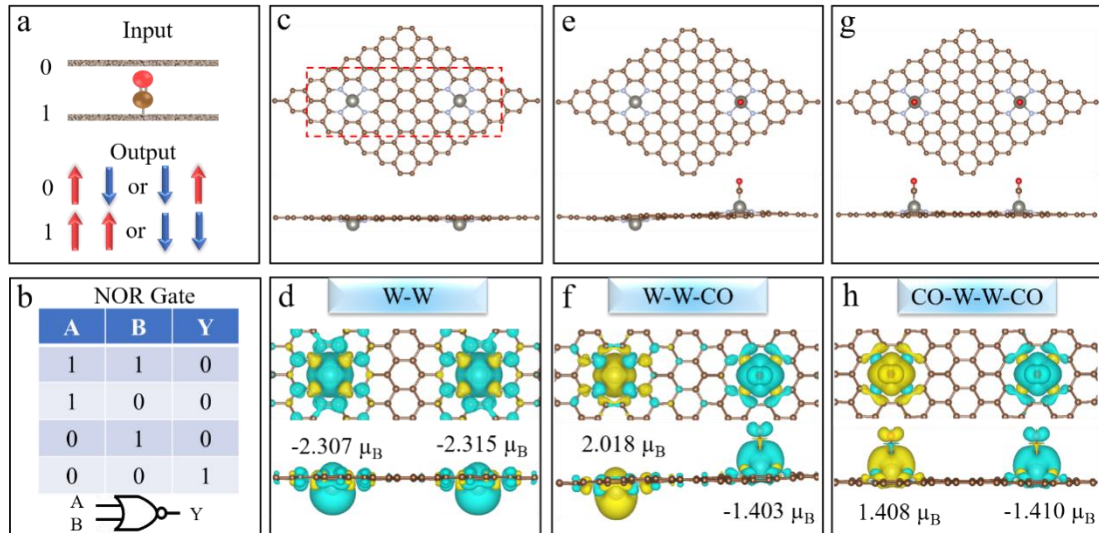

Figure S5. (a) The design of input and output. (b) Truth table and schematic representation of NOR gate. Input A and B are defined as the absence (logic 0) or presence (logic 1) of CO on the two W sites. (c), (e), and (g) are top and side views of optimized structures for W-W, W-W-CO, and CO-W-W-CO, respectively. (d), (f) and (h) are the net spin electron densities for W-W, W-W-CO, and CO-W-W-CO at an isosurface value of  $0.001 \text{ e}\text{\AA}^{-3}$ , respectively. The yellow and blue represent positive and negative signs of the spin densities, respectively. W-W, W-W-CO, and CO-W-W-CO represent  $\text{WN}_4\text{-WN}_4$ ,  $\text{WN}_4\text{-WN}_4$  with the presence of CO on the W site, and  $\text{WN}_4\text{-WN}_4$  with the presence of COs on two W sites, respectively.

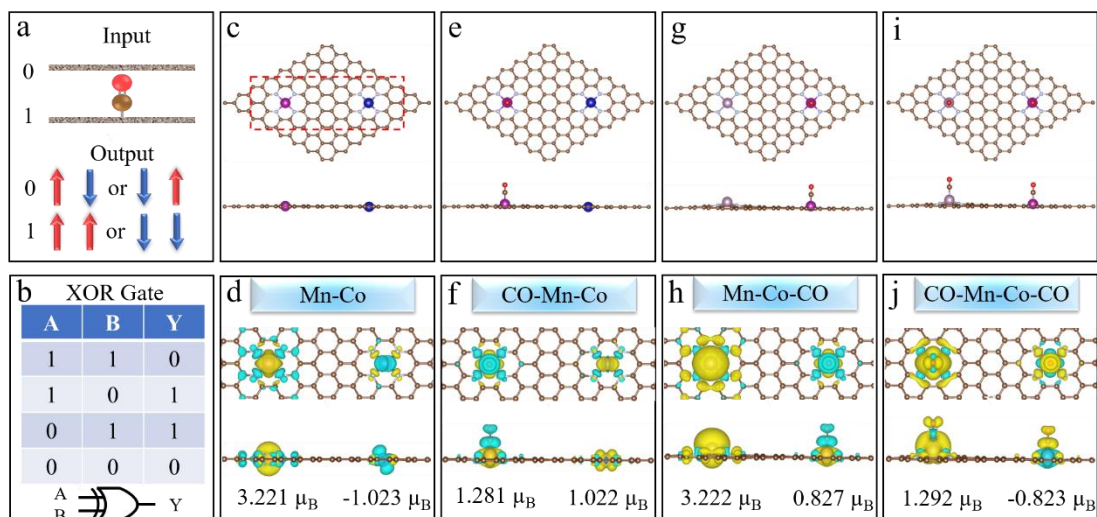

Figure S6. (a) The design of input and output. (b) Truth table and schematic representation of XOR gate. Input A and B are defined as the absence (logic 0) or presence (logic 1) of CO on the Mn and Co sites, respectively. (c), (e), (g), and (i) are top and side views for optimized structures of Mn-Co, CO-Mn-Co, Mn-Co-CO, and CO-Mn-Co-CO, respectively. (d), (f), (h) and (j) are the net spin electron densities for Mn-Co, CO-Mn-Co, Mn-Co-CO, and CO-Mn-Co-CO at an isosurface value of  $0.001 \text{ e}\text{\AA}^{-3}$ , respectively. The yellow and blue represent positive and negative signs of the spin densities, respectively. Mn-Co, CO-Mn-Co, Mn-Co-CO, and CO-Mn-Co-CO represent  $\text{MnN}_4\text{-CoN}_4$ ,  $\text{MnN}_4\text{-CoN}_4$  with the presence of CO on the Mn site,  $\text{MnN}_4\text{-CoN}_4$  with the presence of CO on the Co site, and  $\text{MnN}_4\text{-CoN}_4$  with the presence of COs on both Mn and Co sites, respectively.

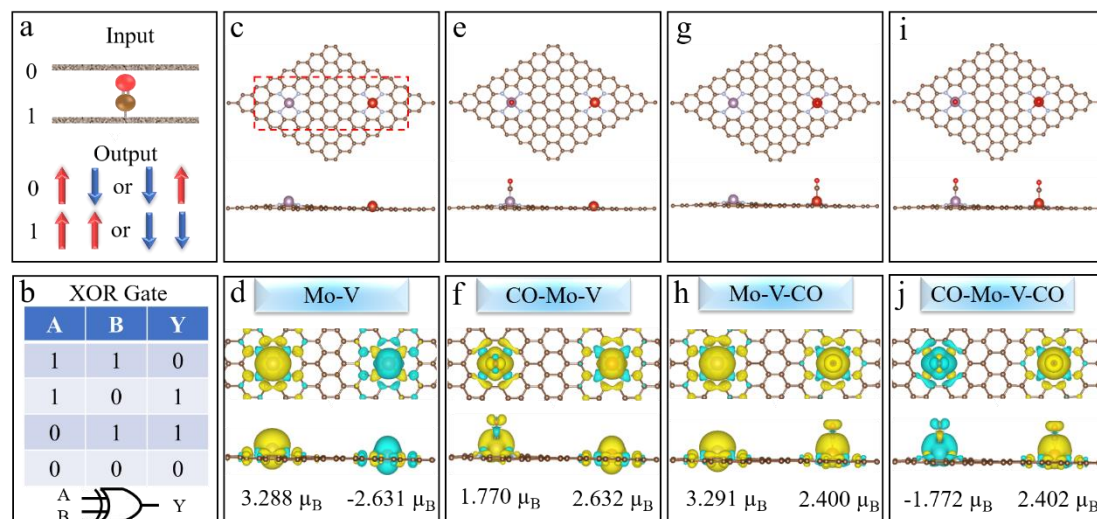

Figure S7. (a) The design of input and output. (b) Truth table and schematic representation of XOR gate. Input A and B are defined as the absence (logic 0) or presence (logic 1) of CO on the Mo and V sites, respectively. (c), (e), (g), and (i) are top and side views for optimized structures of Mo-V, CO-Mo-V, Mo-V-CO, and CO-Mo-V-CO, respectively. (d), (f), (h) and (j) are the net spin electron densities for Mo-V, CO-Mo-V, Mo-V-CO, and CO-Mo-V-CO at an isosurface value of  $0.001 \text{ e}\text{\AA}^{-3}$ , respectively. The yellow and blue represent positive and negative signs of the spin densities, respectively. Mo-V, CO-Mo-V, Mo-V-CO, and CO-Mo-V-CO represent  $\text{MoN}_4\text{-VN}_4$ ,  $\text{MoN}_4\text{-VN}_4$  with the presence of CO on the Mo site,  $\text{MoN}_4\text{-VN}_4$  with the presence of CO on the V site, and  $\text{MoN}_4\text{-VN}_4$  with the presence of COs on both Mo and V sites, respectively.

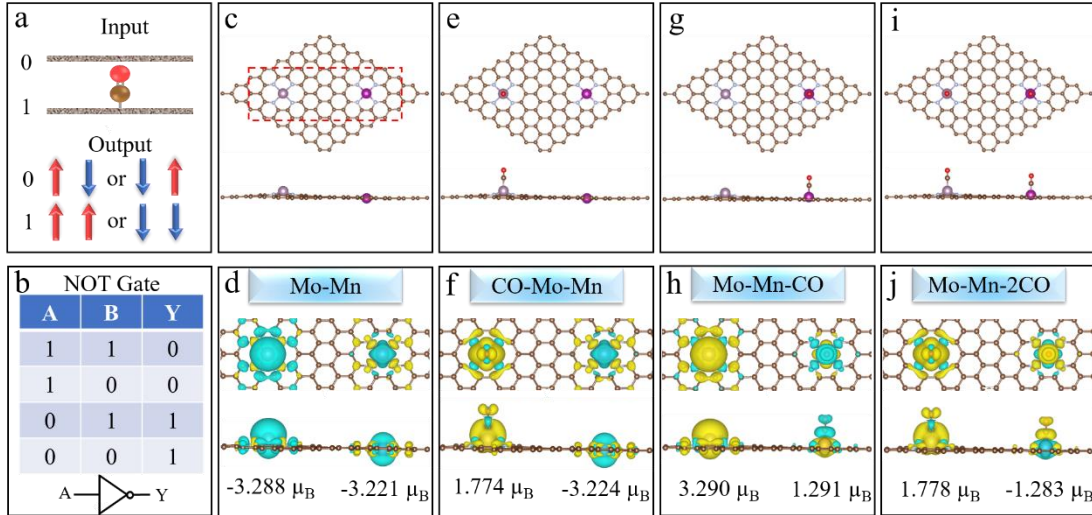

Figure S8. (a) The design of input and output. (b) Truth table and schematic representation of NOT gate. Input A and B are defined as the absence (logic 0) or presence (logic 1) of CO on the Mo and Mn sites, respectively. (c), (e), (g), and (i) are top and side views for optimized structures of Mo-Mn, CO-Mo-Mn, Mo-Mn-CO, and CO-Mo-Mn-CO, respectively. (d), (f), (h) and (j) are the net spin electron densities for Mo-Mn, CO-Mo-Mn, Mo-Mn-CO, and CO-Mo-Mn-CO at an isosurface value of  $0.001 \text{ e}\text{\AA}^{-3}$ , respectively. The yellow and blue represent positive and negative signs of the spin densities, respectively. Mo-Mn, CO-Mo-Mn, Mo-Mn-CO, and CO-Mo-Mn-CO represent  $\text{MoN}_4\text{-MnN}_4$ ,  $\text{MoN}_4\text{-MnN}_4$  with the presence of CO on the Mo site,  $\text{MoN}_4\text{-MnN}_4$  with the presence of CO on the Mn site, and  $\text{MoN}_4\text{-MnN}_4$  with the presence of COs on both Mo and Mn sites, respectively.

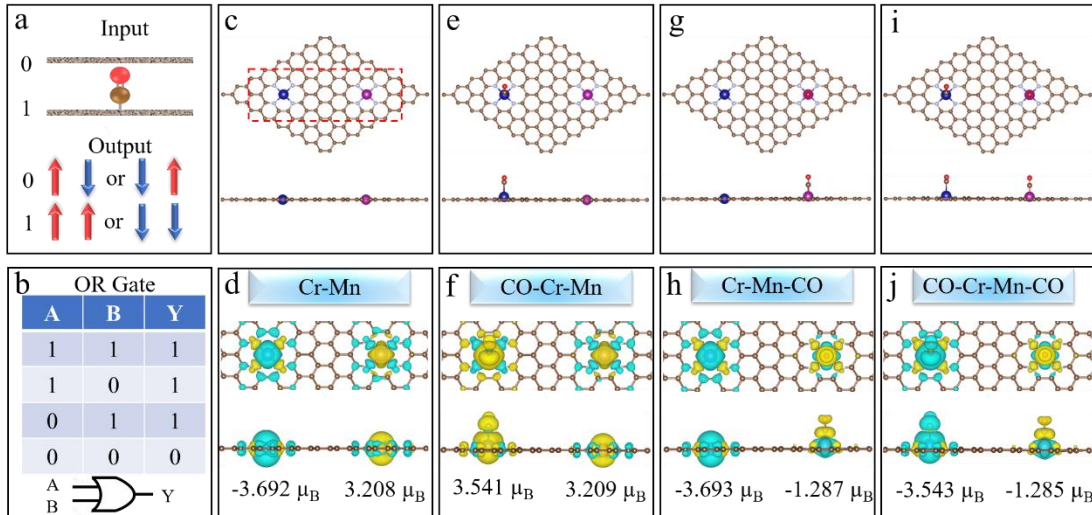

Figure S9. (a) The design of input and output. (b) Truth table and schematic representation of OR gate. Input A and B are defined as the absence (logic 0) or presence (logic 1) of CO on the Cr and Mn sites, respectively. (c), (e), (g), and (i) are top and side views for optimized structures of Cr-Mn, CO-Cr-Mn, Cr-Mn-CO, and CO-Cr-Mn-CO, respectively. (d), (f), (h) and (j) are the net spin electron densities for Cr-Mn, CO-Cr-Mn, Cr-Mn-CO, and CO-Cr-Mn-CO at an isosurface value of  $0.001 \text{ e}\text{\AA}^{-3}$ , respectively. The yellow and blue represent positive and negative signs of the spin densities, respectively. Cr-Mn, CO-Cr-Mn, Cr-Mn-CO, and CO-Cr-Mn-CO represent  $\text{CrN}_4\text{-MnN}_4$ ,  $\text{CrN}_4\text{-MnN}_4$  with the presence of CO on the Cr site,  $\text{CrN}_4\text{-MnN}_4$  with the presence of CO on the Mn site, and  $\text{CrN}_4\text{-MnN}_4$  with the presence of COs on both Cr and Mn sites, respectively.

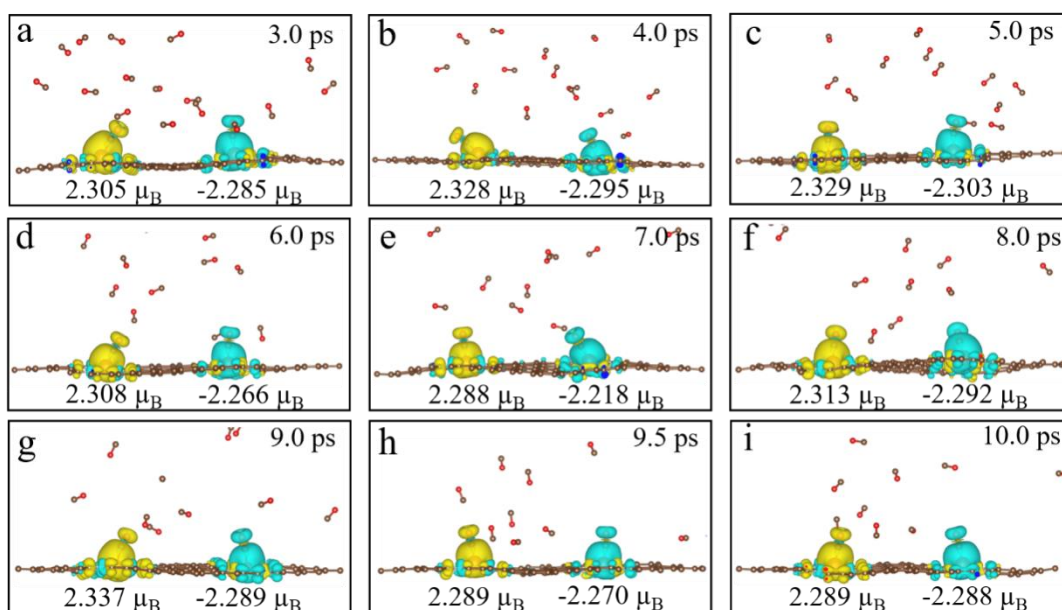

Figure S10. AIMD simulation of CO-V-V-CO in the CO environment at 300K. The spin electron densities at different times plotted at an isosurface value of  $0.001 \text{ e}\text{\AA}^{-3}$  are shown in (a-i). (a)  $t = 3.0$  ps, (b)  $t = 4.0$  ps, (c)  $t = 5.0$  ps, (d)  $t = 6.0$  ps, (e)  $t = 7.0$  ps, (f)  $t = 8.0$  ps, (g)  $t = 9.0$  ps, (h)  $t = 9.5$  ps, (i)  $t = 10.0$  ps.

The studies of the spin-coupling effect and its distance dependence or space propagation in the main text are performed under vacuum condition. In general, the environment around the system under study can affect the properties of the material. In order to roughly understand the influence of the environment on the spin coupling of the materials, here take CO-V-V-CO as an example and carry out the AIMD simulation at room temperature (300K) under an environment full of COs. The results are shown in Figure S10, which show that the spin magnetic moment at a metal site does not change much, and most of the net spin density is distributed on V metals. The directions of the spin magnetic moments on both V sites do not change during simulation, which remain antiparallel. In addition, we also find that the addition of COs in environment can increase the energy difference between different spin states, which thus increases the discrimination of different spin states as compared to vacuum. Therefore, combining AIMD simulations can facilitate the search for the ground-state electronic structure.

### Supplementary Tables

Table S1: Logic gates of the homobimetallic systems (TM<sub>1</sub>N<sub>4</sub>-TM<sub>1</sub>N<sub>4</sub>) and the corresponding truth tables.

| system     |   | Co-Co | V-V | Tc-Tc | W-W |
|------------|---|-------|-----|-------|-----|
| 1          | 1 | 1     | 0   | 0     | 0   |
| 1          | 0 | 1     | 1   | 1     | 0   |
| 0          | 1 | 1     | 1   | 1     | 0   |
| 0          | 0 | 0     | 0   | 0     | 1   |
| logic gate |   | OR    | XOR | XOR   | NOR |

Table S2: Logic gates of the heterobimetallic systems (TM<sub>1</sub>N<sub>4</sub>-TM<sub>2</sub>N<sub>4</sub>) and the corresponding truth tables.

| system     |   | Mo-Mn | Mo-Co | Mo-V | V-Co | Cr-Mn   |
|------------|---|-------|-------|------|------|---------|
| 1          | 1 | 0     | 0     | 0    | 0    | 1       |
| 1          | 0 | 0     | 1     | 1    | 1    | 1       |
| 0          | 1 | 1     | 1     | 1    | 0    | 1       |
| 0          | 0 | 1     | 0     | 0    | 0    | 0       |
| logic gate |   | OR    | NOT   | XOR  | XOR  | INHIBIT |

Table S3. The directions and magnitudes of the total spin magnetic moments and the spin magnetic moments on the two metals sites (TM<sub>1</sub> and TM<sub>2</sub>, which can be either the same or different) in the absence and presence of CO. TM<sub>1</sub>-TM<sub>2</sub>, CO-TM<sub>1</sub>-TM<sub>2</sub>, TM<sub>1</sub>-TM<sub>2</sub>-CO, and CO-TM<sub>1</sub>-TM<sub>2</sub>-CO represent TM<sub>1</sub>N<sub>4</sub>-TM<sub>2</sub>N<sub>4</sub>, TM<sub>1</sub>N<sub>4</sub>-TM<sub>2</sub>N<sub>4</sub> with the presence of CO on the TM<sub>1</sub> site, TM<sub>1</sub>N<sub>4</sub>-TM<sub>2</sub>N<sub>4</sub> with the presence of CO on the TM<sub>2</sub> site, and TM<sub>1</sub>N<sub>4</sub>-TM<sub>2</sub>N<sub>4</sub> with the presence of COs on both TM<sub>1</sub> and TM<sub>2</sub> sites, respectively. For homobimetallic systems, TM<sub>1</sub> and TM<sub>2</sub> are the same, so CO-TM<sub>1</sub>-TM<sub>2</sub> and TM<sub>1</sub>-TM<sub>2</sub>-CO are equivalent. Here use TM-TM-CO to represent TMN<sub>4</sub>-TMN<sub>4</sub> with the presence of CO on one TM site.

|             | Direction    | Spin magnetic moment (μ <sub>B</sub> ) |                 |                 |
|-------------|--------------|----------------------------------------|-----------------|-----------------|
|             |              | total                                  | TM <sub>1</sub> | TM <sub>2</sub> |
| Co-Co       | antiparallel | 0                                      | -1.023          | 1.023           |
| Co-Co-CO    | parallel     | 1.7590                                 | 1.031           | 0.835           |
| CO-Co-Co-CO | parallel     | 1.5682                                 | 0.838           | 0.834           |
| Mn-Mn       | antiparallel | 0                                      | 3.215           | -3.215          |
| Mn-Mn-CO    | antiparallel | -1.9956                                | -3.223          | 1.289           |
| CO-Mn-Mn-CO | antiparallel | 0.0001                                 | 1.282           | -1.282          |
| V-V         | antiparallel | 0                                      | -2.633          | 2.634           |
| V-V-CO      | parallel     | 6.0187                                 | 2.637           | 2.403           |
| CO-V-V-CO   | antiparallel | 0.0007                                 | 2.400           | -2.400          |
| Tc-Tc       | antiparallel | 0                                      | 2.892           | -2.892          |
| Tc-Tc-CO    | parallel     | 4.0060                                 | 2.900           | 1.090           |
| CO-Tc-Tc-CO | antiparallel | 0                                      | 1.089           | -1.089          |
| Fe-Fe       | antiparallel | 0                                      | 2.020           | -2.020          |

|             |              |         |        |        |
|-------------|--------------|---------|--------|--------|
| Fe-Fe-CO    | no           | 2.0015  | 2.021  | 0      |
| CO-Fe-Fe-CO | no           | 0       | 0      | 0      |
| Ru-Ru       | antiparallel | -0.0012 | 1.795  | -1.795 |
| Ru-Ru-CO    | no           | 2.0056  | 1.800  | 0.002  |
| CO-Ru-Ru-CO | no           | 0       | 0      | 0      |
| Mo-Mo       | antiparallel | -0.0038 | 3.280  | -3.281 |
| Mo-Mo-CO    | antiparallel | -1.9574 | -3.283 | 1.761  |
| CO-Mo-Mo-CO | antiparallel | 0       | 1.779  | -1.779 |
| Cr-Cr       | antiparallel | -0.0003 | -3.691 | 3.691  |
| Cr-Cr-CO    | antiparallel | -0.1174 | -3.692 | 3.536  |
| CO-Cr-Cr-CO | antiparallel | -0.0210 | 3.537  | -3.542 |
| W-W         | parallel     | -6.7907 | -2.307 | -2.315 |
| W-W-CO      | antiparallel | 0.2545  | 2.018  | -1.403 |
| CO-W-W-CO   | antiparallel | -0.0001 | 1.408  | -1.410 |
| Mn-Co       | antiparallel | 1.9980  | 3.211  | -1.023 |
| CO-Mn-Co    | parallel     | 2       | 1.281  | 1.022  |
| Mn-Co-CO    | parallel     | 3.8130  | 3.222  | 0.827  |
| CO-Mn-Co-CO | antiparallel | 0.5000  | 1.292  | -0.823 |
| Mo-Mn       | parallel     | -6.9576 | -3.288 | -3.221 |
| CO-Mo-Mn    | antiparallel | -0.9989 | 1.774  | -3.224 |
| Mo-Mn-CO    | parallel     | 4.9872  | 3.290  | 1.291  |
| CO-Mo-Mn-CO | antiparallel | 0.9988  | 1.778  | -1.283 |
| Mo-Co       | antiparallel | 2.9454  | 3.291  | -1.021 |
| CO-Mo-Co    | parallel     | -3.0036 | -1.768 | -1.024 |
| Mo-Co-CO    | antiparallel | 3.2320  | 3.288  | -0.824 |
| CO-Mo-Co-CO | parallel     | 2.8080  | 1.774  | 0.832  |
| Mo-V        | antiparallel | 1       | 3.288  | -2.631 |
| CO-Mo-V     | parallel     | 4.9995  | 1.770  | 2.632  |
| Mo-V-CO     | parallel     | 6.9913  | 3.291  | 2.400  |
| CO-Mo-V-CO  | antiparallel | 1.0036  | -1.772 | 2.402  |
| V-Co        | antiparallel | 1.9885  | 2.636  | -1.022 |
| CO-V-Co     | parallel     | -4.0210 | -2.403 | -1.023 |
| V-Co-CO     | antiparallel | 2.2238  | 2.633  | -0.830 |
| CO-V-Co-CO  | antiparallel | 2.2968  | 2.406  | -0.829 |
| Tc-Co       | parallel     | 4       | 2.896  | 1.022  |
| CO-Tc-Co    | parallel     | -2.0052 | -1.089 | -1.022 |
| Tc-Co-CO    | parallel     | -3.7497 | -2.901 | -0.827 |
| CO-Tc-Co-CO | parallel     | 2       | 1.089  | 0.838  |
| Cr-Co       | antiparallel | -3.0188 | -3.693 | 1.021  |
| CO-Cr-Co    | antiparallel | 2.9396  | 3.546  | -1.022 |
| Cr-Co-CO    | antiparallel | 3.2861  | 3.692  | -0.828 |



|             |              |         |        |        |
|-------------|--------------|---------|--------|--------|
| CO-Cr-Co-CO | antiparallel | 3.2354  | 3.547  | -0.829 |
| Tc-V        | parallel     | 6       | 2.894  | 2.587  |
| CO-Tc-V     | parallel     | 3.9908  | 1.091  | 2.636  |
| Tc-V-CO     | parallel     | 6       | 2.633  | 2.402  |
| CO-Tc-V-CO  | parallel     | 4       | 1.090  | 2.400  |
| Cr-Mn       | antiparallel | -1.0173 | -3.692 | 3.208  |
| CO-Cr-Mn    | parallel     | 7       | 3.541  | 3.209  |
| Cr-Mn-CO    | parallel     | -5.0368 | -3.693 | -1.287 |
| CO-Cr-Mn-CO | parallel     | -4.9768 | -3.543 | -1.285 |

Table S4. The directions and magnitudes of the total spin magnetic moments and the spin magnetic moments of the Cr and Mn sites with different distances in the Cr-Mn system. For different intermetallic distances, the Cr site is unchanged, while the Mn site is located at 1, 2, 3 and 4, respectively (Sites 1-4 are shown in Figure 3 of the main text). Cr-Mn, CO-Cr-Mn, Cr-Mn-CO, and CO-Cr-Mn-CO represent  $\text{CrN}_4\text{-MnN}_4$ ,  $\text{CrN}_4\text{-MnN}_4$  with the presence of CO on the Cr site,  $\text{CrN}_4\text{-MnN}_4$  with the presence of CO on the Mn site, and  $\text{CrN}_4\text{-MnN}_4$  with the presence of COs on both Cr and Mn sites, respectively.

|   |             | Direction    | Spin magnetic moment ( $\mu_B$ ) |        |       |
|---|-------------|--------------|----------------------------------|--------|-------|
|   |             |              | total                            | Cr     | Mn    |
| 1 | Cr-Mn       | antiparallel | -1                               | -3.691 | 3.227 |
|   | CO-Cr-Mn    | antiparallel | -1                               | -3.691 | 3.140 |
|   | Cr-Mn-CO    | antiparallel | -3                               | -3.692 | 1.347 |
|   | CO-Cr-Mn-CO | parallel     | 5                                | 3.563  | 1.347 |
| 2 | Cr-Mn       | antiparallel | -1                               | -3.692 | 3.223 |
|   | CO-Cr-Mn    | antiparallel | -1                               | -3.692 | 3.138 |
|   | Cr-Mn-CO    | antiparallel | -3                               | -3.693 | 1.350 |
|   | CO-Cr-Mn-CO | parallel     | 5                                | 3.563  | 1.348 |
| 3 | Cr-Mn       | antiparallel | -1                               | -3.693 | 3.222 |
|   | CO-Cr-Mn    | antiparallel | -1                               | -3.693 | 3.137 |
|   | Cr-Mn-CO    | antiparallel | -3                               | -3.692 | 1.348 |
|   | CO-Cr-Mn-CO | parallel     | 5                                | 3.559  | 1.347 |
| 4 | Cr-Mn       | antiparallel | -1                               | -3.691 | 3.223 |
|   | CO-Cr-Mn    | antiparallel | -1                               | -3.691 | 3.135 |
|   | Cr-Mn-CO    | antiparallel | -3                               | -3.693 | 1.343 |
|   | CO-Cr-Mn-CO | parallel     | 5                                | 3.559  | 1.349 |

Table S5. The spin direction, the total spin moment and the spin moments of the two metals ( $\text{TM}_1$  and  $\text{TM}_2$ , which can be either the same or different) located at different layers (2 and 3 refer to two and three layers, respectively). For Heterobimetallic systems,  $\text{TM}_1\text{-TM}_2$ ,  $\text{CO-TM}_1\text{-TM}_2$ ,  $\text{TM}_1\text{-TM}_2\text{-CO}$ , and  $\text{CO-TM}_1\text{-TM}_2\text{-CO}$  represent  $\text{TM}_1\text{N}_4\text{-TM}_2\text{N}_4$ ,  $\text{TM}_1\text{N}_4\text{-TM}_2\text{N}_4$  with the presence of CO on the  $\text{TM}_1$  site,  $\text{TM}_1\text{N}_4\text{-TM}_2\text{N}_4$  with the presence of CO on the  $\text{TM}_2$  site, and  $\text{TM}_1\text{N}_4\text{-TM}_2\text{N}_4$  with the

presence of COs on both TM<sub>1</sub> and TM<sub>2</sub> sites, respectively. For homobimetallic systems, TM<sub>1</sub> and TM<sub>2</sub> are the same, so CO-TM<sub>1</sub>-TM<sub>2</sub> and TM<sub>1</sub>-TM<sub>2</sub>-CO are equivalent. Here, only use TM-TM-CO to represent TMN<sub>4</sub>-TMN<sub>4</sub> with the presence of CO on the TM site.

|   |             | Direction    | Spin magnetic moment ( $\mu_B$ ) |                 |                 |
|---|-------------|--------------|----------------------------------|-----------------|-----------------|
|   |             |              | total                            | TM <sub>1</sub> | TM <sub>2</sub> |
| 2 | Tc-Tc       | antiparallel | 0                                | 2.922           | -2.922          |
|   | Tc-Tc-CO    | parallel     | 3.9977                           | 1.088           | 2.933           |
|   | CO-Tc-Tc-CO | antiparallel | 0                                | -1.087          | 1.087           |
| 3 | Tc-Tc       | antiparallel | 0                                | 2.918           | -2.918          |
|   | Tc-Tc-CO    | parallel     | 3.9631                           | 1.089           | 2.926           |
|   | CO-Tc-Tc-CO | antiparallel | 0                                | -1.088          | 1.088           |
| 2 | Cr-Cr       | antiparallel | -0.0001                          | -3.683          | 3.683           |
|   | Cr-Cr-CO    | antiparallel | 0.0043                           | 3.578           | -3.685          |
|   | CO-Cr-Cr-CO | antiparallel | 0.0012                           | 3.582           | -3.581          |
| 3 | Cr-Cr       | antiparallel | 0.0039                           | -3.693          | 3.693           |
|   | Cr-Cr-CO    | antiparallel | -0.1026                          | 3.573           | -3.694          |
|   | CO-Cr-Cr-CO | antiparallel | 0.0147                           | -3.574          | 3.576           |
| 2 | Co-Co       | parallel     | 1.9976                           | 1.026           | 1.026           |
|   | Co-Co-CO    | parallel     | 1.6798                           | 0.844           | 1.028           |
|   | CO-Co-Co-CO | parallel     | -1.5684                          | -0.844          | -0.842          |
| 3 | Co-Co       | parallel     | 2.0046                           | 1.030           | 1.030           |
|   | Co-Co-CO    | antiparallel | 0.3990                           | -0.827          | 1.030           |
|   | CO-Co-Co-CO | antiparallel | 0.0001                           | -0.827          | 0.828           |
| 2 | Mn-Mn       | antiparallel | 0                                | 3.287           | -3.287          |
|   | Mn-Mn-CO    | antiparallel | 1.9972                           | -1.272          | 3.289           |
|   | CO-Mn-Mn-CO | antiparallel | 0                                | 1.273           | -1.274          |
| 3 | Mn-Mn       | antiparallel | -0.0009                          | 3.279           | -3.280          |
|   | Mn-Mn-CO    | antiparallel | -1.9346                          | 1.280           | -3.291          |
|   | CO-Mn-Mn-CO | antiparallel | -0.0018                          | -1.275          | 1.275           |
| 2 | V-V         | antiparallel | 0.0003                           | 2.503           | -2.503          |
|   | V-V-CO      | antiparallel | 0.1848                           | 2.391           | -2.484          |
|   | CO-V-V-CO   | antiparallel | -0.0001                          | 2.402           | -2.402          |
| 3 | V-V         | parallel     | -5.5555                          | -2.570          | -2.568          |
|   | V-V-CO      | antiparallel | 0.3345                           | 2.405           | -2.550          |
|   | CO-V-V-CO   | parallel     | -6.1755                          | -2.409          | -2.409          |
| 2 | Cr-Mn       | antiparallel | 0.9986                           | 3.687           | -3.277          |
|   | CO-Cr-Mn    | antiparallel | 0.9986                           | 3.578           | -3.284          |
|   | Cr-Mn-CO    | parallel     | 5.0203                           | 3.687           | 1.279           |
|   | CO-Cr-Mn-CO | parallel     | -5.0259                          | -3.589          | -1.278          |
| 3 | Cr-Mn       | antiparallel | 1.0179                           | 3.694           | -3.280          |
|   | CO-Cr-Mn    | antiparallel | 0.9098                           | 3.570           | -3.288          |
|   | Cr-Mn-CO    | antiparallel | 2.9493                           | 3.695           | -1.283          |

|             |              |        |       |        |
|-------------|--------------|--------|-------|--------|
| CO-Cr-Mn-CO | antiparallel | 2.8914 | 3.578 | -1.281 |
|-------------|--------------|--------|-------|--------|

Table S6. The formation energies ( $\Delta E$ ) and TM-N bond lengths of  $\text{TM}_1\text{N}_4\text{-TM}_2\text{N}_4$ . The TM-N bond lengths are ordered by increasing  $m$  values ( $m = 1,2,3,4,5,6,7,8$ ) provided in Figure S1.  $\text{TM}_1\text{-TM}_2$ ,  $\text{TM}_1\text{-TM}_2\text{-nlayer}$  ( $n = 2,3$ ) and  $\text{Cr-Mn-n}$  ( $n=1-4$ ) represent  $\text{TM}_1\text{N}_4\text{-TM}_2\text{N}_4$ ,  $\text{TM}_1\text{N}_4\text{-TM}_2\text{N}_4$  from different layers ( $n$  is the number of layers), and  $\text{CrN}_4\text{-MnN}_4$  with different distances between the Cr and Mn sites within the same graphite layer (the Cr site is unchanged,  $n$  represents the position of the Mn site, concretely shown in Figure 3 of the main text), respectively.

|              | $\Delta E$ (eV) | TM-N Bond Length ( $\text{\AA}$ )               |
|--------------|-----------------|-------------------------------------------------|
| Co-Co        | -1.662          | 1.900,1.900,1.901,1.901,1.901,1.901,1.900,1.900 |
| Mn-Mn        | -2.387          | 1.931,1.930,1.932,1.932,1.931,1.932,1.930,1.930 |
| Tc-Tc        | -3.936          | 1.992,1.992,1.991,1.991,1.991,1.991,1.992,1.992 |
| V-V          | -1.092          | 2.001,2.001,2.001,2.001,2.002,2.001,2.001,2.001 |
| Fe-Fe        | -0.858          | 1.917,1.917,1.918,1.918,1.918,1.918,1.917,1.917 |
| Ru-Ru        | -2.536          | 1.971,1.971,1.972,1.971,1.970,1.971,1.971,1.970 |
| Mo-Mo        | 1.245           | 2.076,2.075,2.076,2.076,2.075,2.075,2.075,2.075 |
| Cr-Cr        | -2.200          | 1.968,1.969,1.969,1.969,1.969,1.969,1.968,1.969 |
| W-W          | 2.687           | 2.044,2.044,2.040,2.041,2.041,2.041,2.045,2.044 |
| Mn-Co        | -2.025          | 1.932,1.932,1.933,1.933,1.899,1.899,1.898,1.899 |
| Mo-Mn        | -0.610          | 2.077,2.077,2.078,2.078,1.932,1.932,1.930,1.930 |
| Mo-Co        | -0.250          | 2.078,2.078,2.078,2.077,1.899,1.899,1.898,1.898 |
| Mo-V         | 0.066           | 2.078,2.077,2.079,2.078,1.993,1.993,1.993,1.993 |
| V-Co         | -1.389          | 2.002,2.002,2.001,2.001,1.899,1.898,1.897,1.897 |
| Tc-Co        | -2.823          | 2.003,2.002,2.002,2.003,1.892,1.892,1.890,1.890 |
| Cr-Co        | -1.942          | 1.971,1.971,1.971,1.971,1.899,1.898,1.897,1.897 |
| Tc-V         | -2.520          | 1.994,1.994,1.993,1.994,2.000,2.000,2.000,2.000 |
| Cr-Mn        | -2.295          | 1.970,1.970,1.970,1.970,1.931,1.931,1.930,1.930 |
| Tc-Tc-2layer | -4.590          | 1.998,1.998,1.996,1.996,1.996,1.996,1.998,1.998 |
| Tc-Tc-3layer | -4.506          | 1.996,1.997,1.997,1.996,1.996,1.996,1.996,1.996 |
| Cr-Cr-2layer | -2.538          | 1.976,1.977,1.975,1.975,1.976,1.975,1.977,1.976 |
| Cr-Cr-3layer | -2.496          | 1.976,1.976,1.977,1.976,1.976,1.976,1.976,1.976 |
| Co-Co-2layer | -1.934          | 1.912,1.912,1.911,1.911,1.911,1.911,1.912,1.912 |
| Co-Co-3layer | -1.865          | 1.911,1.912,1.912,1.912,1.912,1.912,1.912,1.911 |
| Mn-Mn-2layer | -2.809          | 1.938,1.939,1.937,1.937,1.937,1.937,1.939,1.939 |
| Mn-Mn-3layer | -2.717          | 1.937,1.937,1.938,1.937,1.937,1.937,1.937,1.937 |
| V-V-2layer   | -1.899          | 2.034,2.035,2.044,2.044,2.044,2.044,2.034,2.034 |
| V-V-3layer   | -1.605          | 2.031,2.031,2.027,2.026,2.031,2.031,2.026,2.026 |
| Cr-Mn-2layer | -2.665          | 1.977,1.976,1.974,1.974,1.937,1.937,1.938,1.938 |
| Cr-Mn-3layer | -2.608          | 1.977,1.977,1.976,1.976,1.937,1.937,1.937,1.937 |
| Cr-Mn-1      | -1.188          | 1.981,1.981,1.980,1.980,1.935,1.935,1.935,1.935 |
| Cr-Mn-2      | -1.185          | 1.981,1.981,1.981,1.981,1.936,1.936,1.936,1.936 |

|         |        |                                                 |
|---------|--------|-------------------------------------------------|
| Cr-Mn-3 | -1.179 | 1.980,1.981,1.981,1.980,1.936,1.936,1.936,1.936 |
| Cr-Mn-4 | -1.179 | 1.980,1.980,1.980,1.980,1.937,1.937,1.937,1.937 |

Table S7. CO adsorption energies, TM-C (in the presence CO) bond lengths and TM-N bond lengths of the homobimetallic systems. TM-TM-CO and CO-TM-TM-CO represent TMN<sub>4</sub>-TMN<sub>4</sub> with the presence of CO on the TM site, and TMN<sub>4</sub>-TMN<sub>4</sub> with the presence of COs on two TM sites, respectively. nlayer (n = 2,3) represent systems with different layers (n being the number of layers). ΔE of TM-TM-CO and CO-TM-TM-CO represent the adsorption energy of the first and the second CO, respectively. For CO-TM-TM-CO, the order of TM-C bond lengths are the first one for the left or top TM, while the second one for the right or down TM. The TM-N bond lengths are ordered by increasing m values (m = 1,2,3,4,5,6,7,8) shown in Figure S1.

|                       | ΔE (eV) | TM-C Bond Length (Å) | TM-N Bond Length (Å)                            |
|-----------------------|---------|----------------------|-------------------------------------------------|
| Co-Co-CO              | -0.600  | 1.859                | 1.932,1.931,1.933,1.932,1.906,1.907,1.905,1.904 |
| CO-Co-Co-CO           | -0.640  | 1.859,1.863          | 1.933,1.932,1.934,1.934,1.932,1.930,1.933,1.931 |
| Mn-Mn-CO              | -0.362  | 1.763                | 1.952,1.953,1.953,1.953,1.932,1.932,1.932,1.931 |
| CO-Mn-Mn-CO           | -0.338  | 1.763,1.762          | 1.954,1.954,1.953,1.954,1.952,1.952,1.952,1.952 |
| V-V-CO                | -1.259  | 2.018                | 2.043,2.043,2.044,2.044,2.004,2.005,2.005,2.005 |
| CO-V-V-CO             | -1.162  | 2.018,2.018          | 2.042,2.042,2.041,2.042,2.040,2.041,2.042,2.042 |
| Tc-Tc-CO              | -1.803  | 1.821                | 2.022,2.022,2.022,2.021,1.997,1.997,1.997,1.998 |
| CO-Tc-Tc-CO           | -1.692  | 1.820,1.820          | 2.019,2.019,2.019,2.019,2.019,2.019,2.019,2.019 |
| Fe-Fe-CO              | -0.722  | 1.721                | 1.930,1.930,1.930,1.930,1.918,1.918,1.918,1.918 |
| CO-Fe-Fe-CO           | -0.717  | 1.722,1.722          | 1.931,1.931,1.931,1.931,1.931,1.931,1.931,1.931 |
| Ru-Ru-CO              | -2.176  | 1.777                | 1.990,1.990,1.993,1.992,1.972,1.972,1.973,1.973 |
| CO-Ru-Ru-CO           | -2.126  | 1.778,1.778          | 1.992,1.992,1.994,1.993,1.991,1.990,1.990,1.990 |
| Mo-Mo-CO              | -1.498  | 1.973                | 2.070,2.069,2.066,2.066,2.072,2.073,2.072,2.073 |
| CO-Mo-Mo-CO           | -1.496  | 1.975,1.975          | 2.070,2.069,2.066,2.067,2.062,2.062,2.068,2.067 |
| Cr-Cr-CO              | -0.312  | 2.255                | 1.986,1.990,1.987,1.990,1.970,1.970,1.970,1.969 |
| CO-Cr-Cr-CO           | -0.301  | 2.253,2.268          | 1.988,1.991,1.988,1.992,1.984,1.987,1.983,1.986 |
| W-W-CO                | -2.393  | 1.968                | 2.061,2.061,2.066,2.066,2.034,2.034,2.033,2.033 |
| CO-W-W-CO             | -2.182  | 1.968,1.968          | 2.059,2.059,2.061,2.060,2.060,2.060,2.061,2.061 |
| Tc-Tc-CO<br>2layer    | -1.627  | 1.822                | 2.013,2.013,2.010,2.010,1.998,1.999,2.001,2.001 |
| CO-Tc-Tc-CO<br>2layer | -1.548  | 1.823,1.823          | 2.012,2.012,2.007,2.007,2.007,2.007,2.012,2.012 |
| Tc-Tc-CO<br>3layer    | -1.625  | 1.821                | 2.011,2.012,2.012,2.012,1.998,1.997,1.997,1.997 |
| CO-Tc-Tc-CO<br>3layer | -1.596  | 1.821,1.821          | 2.011,2.011,2.012,2.012,2.010,2.010,2.011,2.011 |
| Cr-Cr-CO<br>2layer    | -0.235  | 2.356                | 1.977,1.979,1.976,1.978,1.976,1.976,1.977,1.977 |
| CO-Cr-Cr-CO           | -0.231  | 2.361,2.366          | 1.977,1.978,1.976,1.978,1.975,1.977,1.976,1.978 |

|             |        |             |                                                 |
|-------------|--------|-------------|-------------------------------------------------|
| 2layer      |        |             |                                                 |
| Cr-Cr-CO    | -0.247 | 2.334       | 1.980,1.977,1.980,1.977,1.977,1.977,1.977,1.978 |
| 3layer      |        |             |                                                 |
| CO-Cr-Cr-CO | -0.239 | 2.334,2.338 | 1.980,1.978,1.980,1.978,1.979,1.977,1.980,1.977 |
| 3layer      |        |             |                                                 |
| Co-Co-CO    | -0.533 | 1.871       | 1.933,1.933,1.935,1.936,1.911,1.911,1.911,1.911 |
| 2layer      |        |             |                                                 |
| CO-Co-Co-CO | -0.555 | 1.875,1.876 | 1.931,1.932,1.935,1.935,1.935,1.933,1.934,1.931 |
| 2layer      |        |             |                                                 |
| Co-Co-CO    | -0.593 | 1.861       | 1.934,1.934,1.937,1.936,1.911,1.912,1.912,1.912 |
| 3layer      |        |             |                                                 |
| CO-Co-Co-CO | -0.593 | 1.862,1.862 | 1.933,1.934,1.936,1.935,1.937,1.936,1.933,1.933 |
| 3layer      |        |             |                                                 |
| Mn-Mn-CO    | -0.234 | 1.764       | 1.954,1.954,1.951,1.951,1.938,1.937,1.939,1.939 |
| 2layer      |        |             |                                                 |
| CO-Mn-Mn-CO | -0.222 | 1.764,1.765 | 1.953,1.954,1.951,1.951,1.952,1.952,1.954,1.953 |
| 2layer      |        |             |                                                 |
| Mn-Mn-CO    | -0.258 | 1.765       | 1.953,1.953,1.955,1.954,1.937,1.937,1.938,1.938 |
| 3layer      |        |             |                                                 |
| CO-Mn-Mn-CO | -0.252 | 1.765,1.765 | 1.953,1.953,1.954,1.954,1.953,1.953,1.954,1.954 |
| 3layer      |        |             |                                                 |
| V-V-CO      | -0.882 | 2.021       | 2.030,2.032,2.033,2.034,2.060,2.061,2.047,2.047 |
| 2layer      |        |             |                                                 |
| CO-V-V-CO   | -0.786 | 2.020,2.020 | 2.035,2.036,2.034,2.034,2.034,2.034,2.035,2.035 |
| 2layer      |        |             |                                                 |
| V-V-CO      | -1.024 | 2.019       | 2.037,2.038,2.036,2.037,2.041,2.041,2.038,2.040 |
| 3layer      |        |             |                                                 |
| CO-V-V-CO   | -0.909 | 2.019,2.020 | 2.035,2.034,2.035,2.035,2.035,2.035,2.036,2.036 |
| 3layer      |        |             |                                                 |

Table S8. CO adsorption energies, TM-C bond lengths and TM-N bond lengths of the heterobimetallic systems. CO-TM<sub>1</sub>-TM<sub>2</sub>, TM<sub>1</sub>-TM<sub>2</sub>-CO, and CO-TM<sub>1</sub>-TM<sub>2</sub>-CO represent TM<sub>1</sub>N<sub>4</sub>-TM<sub>2</sub>N<sub>4</sub>, TM<sub>1</sub>N<sub>4</sub>-TM<sub>2</sub>N<sub>4</sub> with the presence of CO on the TM<sub>1</sub> site, TM<sub>1</sub>N<sub>4</sub>-TM<sub>2</sub>N<sub>4</sub> with the presence of CO on the TM<sub>2</sub> site, and TM<sub>1</sub>N<sub>4</sub>-TM<sub>2</sub>N<sub>4</sub> with the presence of COs on both TM<sub>1</sub> and TM<sub>2</sub> sites, respectively. nlayer (n = 2,3) and n (n = 1-4) represent systems different layers (n being the number of layers) and different positions of Mn site within the same graphite layer (with the Cr site unchanged, concretely shown in Figure 3), respectively. Subscript a and b represent the first and the second adsorption sites, respectively. ΔE of CO-TM<sub>1</sub>-TM<sub>2</sub> and TM<sub>1</sub>-TM<sub>2</sub>-CO represent the adsorption energies of the first CO, and ΔE of CO-TM<sub>1</sub>-TM<sub>2</sub>-CO represents the adsorption energy of the second CO. The order of TM-C bond lengths for CO-TM<sub>1</sub>-TM<sub>2</sub>-CO are the first one for TM<sub>1</sub> and the second one for TM<sub>2</sub>. The TM-N bond lengths are ordered by increasing m values (m = 1,2,3,4,5,6,7,8) shown in Figure S1.

| ΔE (eV) | TM-C Bond | TM-N Bond Length (Å) |
|---------|-----------|----------------------|
|---------|-----------|----------------------|

| <b>Length (Å)</b>                       |        |             |                                                 |
|-----------------------------------------|--------|-------------|-------------------------------------------------|
| CO-Mn-Co                                | -0.354 | 1.763       | 1.954,1.954,1.954,1.954,1.899,1.899,1.898,1.899 |
| CO-Mn <sub>a</sub> -Co <sub>b</sub> -CO | -0.609 | 1.763,1.768 | 1.953,1.953,1.955,1.955,1.927,1.928,1.927,1.928 |
| Mn-Co-CO                                | -0.615 | 1.857       | 1.932,1.932,1.933,1.933,1.931,1.931,1.931,1.930 |
| CO-Mn <sub>b</sub> -Co <sub>a</sub> -CO | -0.348 | 1.763,1.768 | 1.953,1.953,1.955,1.955,1.927,1.928,1.927,1.928 |
| CO-Mo-Mn                                | -1.518 | 1.975       | 2.070,2.069,2.070,2.069,1.932,1.932,1.932,1.931 |
| CO-Mo <sub>a</sub> -Mn <sub>b</sub> -CO | -0.327 | 1.974,1.764 | 2.069,2.068,2.066,2.067,1.952,1.952,1.952,1.952 |
| Mo-Mn-CO                                | -0.359 | 1.763       | 2.079,2.078,2.078,2.077,1.951,1.951,1.951,1.951 |
| CO-Mo <sub>b</sub> -Mn <sub>a</sub> -CO | -1.486 | 1.974,1.764 | 2.069,2.068,2.066,2.067,1.952,1.952,1.952,1.952 |
| CO-Mo-Co                                | -1.489 | 1.973       | 2.068,2.069,2.068,2.069,1.900,1.901,1.899,1.899 |
| CO-Mo <sub>a</sub> -Co <sub>b</sub> -CO | -0.598 | 1.973,1.859 | 2.069,2.069,2.067,2.067,1.931,1.931,1.932,1.932 |
| Mo-Co-CO                                | -0.613 | 1.855       | 2.077,2.076,2.077,2.077,1.931,1.930,1.931,1.931 |
| CO-Mo <sub>b</sub> -Co <sub>a</sub> -CO | -1.475 | 1.973,1.859 | 2.069,2.069,2.067,2.067,1.931,1.931,1.932,1.932 |
| CO-Mo-V                                 | -1.499 | 1.974       | 2.070,2.070,2.070,2.070,1.994,1.995,1.996,1.995 |
| CO-Mo <sub>a</sub> -V <sub>b</sub> -CO  | -1.205 | 1.975,2.018 | 2.070,2.070,2.068,2.068,2.039,2.041,2.041,2.041 |
| Mo-V-CO                                 | -1.211 | 2.017       | 2.079,2.078,2.079,2.078,2.039,2.039,2.041,2.041 |
| CO-Mo <sub>b</sub> -V <sub>a</sub> -CO  | -1.493 | 1.975,2.018 | 2.070,2.070,2.068,2.068,2.039,2.041,2.041,2.041 |
| CO-V-Co                                 | -1.212 | 2.019       | 2.045,2.044,2.043,2.044,1.901,1.901,1.900,1.900 |
| CO-V <sub>a</sub> -Co <sub>b</sub> -CO  | -0.608 | 2.019,1.861 | 2.045,2.044,2.044,2.044,1.931,1.930,1.932,1.931 |
| V-Co-CO                                 | -0.618 | 1.856       | 2.000,2.000,2.000,2.001,1.931,1.931,1.930,1.931 |
| V <sub>b</sub> -Co <sub>a</sub> -CO     | -1.203 | 2.019,1.861 | 2.045,2.044,2.044,2.044,1.931,1.930,1.932,1.931 |
| CO-Tc-Co                                | -2.016 | 1.821       | 2.022,2.022,2.022,2.022,2.006,2.006,2.006,2.006 |
| CO-Tc <sub>a</sub> -Co <sub>b</sub> -CO | -0.615 | 1.821,2.017 | 2.023,2.023,2.022,2.022,2.039,2.039,2.039,2.039 |
| Tc-Co-CO                                | -0.893 | 2.018       | 2.004,2.004,2.004,2.004,2.042,2.042,2.041,2.042 |
| CO-Tc <sub>b</sub> -Co <sub>a</sub> -CO | -1.738 | 1.821,2.017 | 2.023,2.023,2.022,2.022,2.039,2.039,2.039,2.039 |
| CO-Cr-Co                                | -0.303 | 2.271       | 1.987,1.990,1.987,1.990,1.899,1.899,1.898,1.898 |
| CO-Cr <sub>a</sub> -Co <sub>b</sub> -CO | -0.621 | 2.271,1.856 | 1.988,1.991,1.988,1.992,1.931,1.932,1.931,1.930 |
| Cr-Co-CO                                | -0.619 | 1.854       | 1.971,1.971,1.972,1.972,1.931,1.931,1.929,1.930 |
| CO-Cr <sub>b</sub> -Co <sub>a</sub> -CO | -0.304 | 2.271,1.856 | 1.988,1.991,1.988,1.992,1.931,1.932,1.931,1.930 |
| CO-Tc-V                                 | -2.100 | 1.821       | 2.022,2.022,2.022,2.022,2.006,2.006,2.006,2.006 |
| CO-Tc <sub>a</sub> -V <sub>b</sub> -CO  | -1.149 | 1.821,2.017 | 2.023,2.023,2.022,2.022,2.039,2.039,2.039,2.039 |
| Tc-V-CO                                 | -1.169 | 2.018       | 1.995,1.995,1.996,1.995,2.042,2.042,2.040,2.040 |
| CO-Tc <sub>b</sub> -V <sub>a</sub> -CO  | -1.786 | 1.821,2.017 | 2.023,2.023,2.022,2.022,2.039,2.039,2.039,2.039 |
| CO-Cr-Mn                                | -0.305 | 2.262       | 1.987,1.990,1.986,1.990,1.932,1.932,1.930,1.930 |
| CO-Cr <sub>a</sub> -Mn <sub>b</sub> -CO | -0.352 | 2.262,1.762 | 1.989,1.992,1.988,1.992,1.952,1.952,1.951,1.951 |
| Cr-Mn-CO                                | -0.358 | 1.762       | 1.971,1.971,1.971,1.971,1.951,1.951,1.951,1.951 |
| CO-Cr <sub>b</sub> -Mn <sub>a</sub> -CO | -0.299 | 2.262,1.762 | 1.989,1.992,1.988,1.992,1.952,1.952,1.951,1.951 |
| CO-Cr-Mn                                | -0.241 | 2.350       | 1.977,1.979,1.975,1.977,1.937,1.938,1.938,1.938 |
| 2layer                                  |        |             |                                                 |
| CO-Cr <sub>a</sub> -Mn <sub>b</sub> -CO | -0.232 | 2.385,1.765 | 1.975,1.977,1.974,1.976,1.952,1.953,1.954,1.953 |
| 2layer                                  |        |             |                                                 |
| Cr-Mn-CO                                | -0.246 | 1.765       | 1.978,1.978,1.977,1.977,1.952,1.952,1.954,1.954 |

|                                           |        |             |                                                 |
|-------------------------------------------|--------|-------------|-------------------------------------------------|
| 2layer                                    |        |             |                                                 |
| CO-Cr <sub>b</sub> -Mn <sub>a</sub> -CO   | -0.228 | 2.385,1.765 | 1.975,1.977,1.974,1.976,1.952,1.953,1.954,1.953 |
| 2layer                                    |        |             |                                                 |
| CO-Cr-Mn                                  | -0.245 | 2.325       | 1.979,1.981,1.978,1.980,1.938,1.937,1.936,1.937 |
| 3layer                                    |        |             |                                                 |
| CO-Cr <sub>a</sub> -Mn <sub>b</sub> -CO   | -0.259 | 2.338,1.764 | 1.978,1.980,1.978,1.980,1.954,1.954,1.953,1.953 |
| 3layer                                    |        |             |                                                 |
| Cr-Mn-CO                                  | -0.265 | 1.764       | 1.977,1.977,1.977,1.977,1.953,1.953,1.954,1.954 |
| 3layer                                    |        |             |                                                 |
| CO-Cr <sub>b</sub> -Mn <sub>a</sub> -CO   | -0.240 | 2.338,1.764 | 1.978,1.980,1.978,1.980,1.954,1.954,1.953,1.953 |
| 3layer                                    |        |             |                                                 |
| CO-Cr-Mn-1                                | -0.449 | 2.152       | 1.951,1.954,1.951,1.954,1.981,1.981,1.981,1.981 |
| CO-Cr <sub>a</sub> -Mn <sub>b</sub> -CO-1 | -0.377 | 2.300,1.765 | 1.998,1.994,1.997,1.994,1.951,1.951,1.952,1.952 |
| Cr-Mn-CO-1                                | -0.530 | 1.765       | 1.982,1.981,1.981,1.981,1.950,1.950,1.951,1.952 |
| CO-Cr <sub>b</sub> -Mn <sub>a</sub> -CO-1 | -0.296 | 2.300,1.765 | 1.998,1.994,1.997,1.994,1.951,1.951,1.952,1.952 |
| CO-Cr-Mn-2                                | -0.421 | 2.154       | 1.952,1.956,1.952,1.956,1.981,1.982,1.982,1.981 |
| CO-Cr <sub>a</sub> -Mn <sub>b</sub> -CO-2 | -0.384 | 2.301,1.765 | 1.998,1.995,1.998,1.995,1.952,1.952,1.952,1.952 |
| Cr-Mn-CO-2                                | -0.506 | 1.766       | 1.982,1.982,1.982,1.982,1.953,1.952,1.952,1.952 |
| CO-Cr <sub>b</sub> -Mn <sub>a</sub> -CO-2 | -0.299 | 2.301,1.765 | 1.998,1.995,1.998,1.995,1.952,1.952,1.952,1.952 |
| CO-Cr-Mn-3                                | -0.419 | 2.151       | 1.954,1.956,1.953,1.956,1.982,1.982,1.982,1.982 |
| CO-Cr <sub>a</sub> -Mn <sub>b</sub> -CO-3 | -0.400 | 2.292,1.765 | 1.998,1.996,1.999,1.995,1.952,1.952,1.953,1.952 |
| Cr-Mn-CO-3                                | -0.511 | 1.765       | 1.981,1.982,1.981,1.982,1.952,1.951,1.952,1.952 |
| CO-Cr <sub>b</sub> -Mn <sub>a</sub> -CO-3 | -0.308 | 2.292,1.765 | 1.998,1.996,1.999,1.995,1.952,1.952,1.953,1.952 |
| CO-Cr-Mn-4                                | -0.421 | 2.148       | 1.953,1.957,1.953,1.956,1.981,1.981,1.981,1.981 |
| CO-Cr <sub>a</sub> -Mn <sub>b</sub> -CO-4 | -0.391 | 2.294,1.765 | 1.998,1.995,1.998,1.995,1.953,1.953,1.953,1.953 |
| Cr-Mn-CO-4                                | -0.520 | 1.764       | 1.982,1.982,1.981,1.982,1.951,1.950,1.950,1.950 |
| CO-Cr <sub>b</sub> -Mn <sub>a</sub> -CO-4 | -0.292 | 2.294,1.765 | 1.998,1.995,1.998,1.995,1.953,1.953,1.953,1.953 |

Table S9: Collection of calculated spin states. The initial spin moments on two metal sites, final total spin moments and total energies are provided. TM<sub>1</sub>-TM<sub>2</sub>, CO-TM<sub>1</sub>-TM<sub>2</sub>, TM<sub>1</sub>-TM<sub>2</sub>-CO and CO-TM<sub>1</sub>-TM<sub>2</sub>-CO represent TM<sub>1</sub>N<sub>4</sub>-TM<sub>2</sub>N<sub>4</sub>, TM<sub>1</sub>N<sub>4</sub>-TM<sub>2</sub>N<sub>4</sub> with the presence of CO on the TM<sub>1</sub> site, TM<sub>1</sub>N<sub>4</sub>-TM<sub>2</sub>N<sub>4</sub> with the presence of CO on the TM<sub>2</sub> site, and TM<sub>1</sub>N<sub>4</sub>-TM<sub>2</sub>N<sub>4</sub> with the presence of COs on both TM<sub>1</sub> and TM<sub>2</sub> sites, respectively. For the homobimetallic systems, TM<sub>1</sub> and TM<sub>2</sub> are the same, so CO-TM<sub>1</sub>-TM<sub>2</sub> and TM<sub>1</sub>-TM<sub>2</sub>-CO are equivalent. Here use TM-TM-CO to represent TMN<sub>4</sub>-TMN<sub>4</sub> with the presence of CO on one TM site. nlayer (n = 2,3) and L-n (n = 1-4) represent systems with different layers (n being the number of layers) and different positions of Mn site within the same graphite layer (concretely shown in Figure 3), respectively. The spin moments with the lowest energy are in bold.

|  | Initial spin<br>(TM <sub>1</sub> ) (μ <sub>B</sub> ) | Initial spin<br>(TM <sub>2</sub> ) (μ <sub>B</sub> ) | Final total spin<br>(μ <sub>B</sub> ) | Total energy<br>(eV) |
|--|------------------------------------------------------|------------------------------------------------------|---------------------------------------|----------------------|
|  | 0                                                    | 0                                                    | 0.9942                                | -1150.578350         |
|  | 0                                                    | 1                                                    | 0.9792                                | -1150.563718         |
|  | 0                                                    | -1                                                   | -0.0011                               | -1151.137407         |

|             |           |                |                     |                     |
|-------------|-----------|----------------|---------------------|---------------------|
| Co-Co       | 1         | 1              | -0.9940             | -1150.578274        |
|             | 1         | -1             | -0.0011             | -1151.137321        |
|             | -1        | 1              | -0.9942             | -1150.578363        |
|             | 1.5       | 1.5            | 2                   | -1151.137345        |
|             | -1.5      | -1.5           | 0.0002              | -1149.985972        |
|             | 2         | 2              | 2.0001              | -1151.126083        |
|             | -2        | -2             | -1.9976             | -1151.123760        |
|             | <b>-1</b> | <b>-1</b>      | <b>0</b>            | <b>-1151.148766</b> |
| Co-Co-CO    | 0         | 0              | -0.0338             | -1165.801309        |
|             | 1         | 0              | -1.7580             | -1166.523366        |
|             | -1        | 0              | -1.0051             | -1166.325903        |
|             | 0         | 1              | -1.7923             | -1166.521044        |
|             | <b>0</b>  | <b>-1</b>      | <b>1.7590</b>       | <b>-1166.523670</b> |
|             | 1         | 1              | 1.0074              | -1166.319170        |
|             | -1        | 1              | 1.0074              | -1166.319049        |
|             | 1         | -1             | 0.0006              | -1165.788656        |
|             | -1.5      | 1              | 0                   | -1166.522355        |
|             | 1.5       | -1             | 0                   | -1166.522614        |
| -1          | -1        | 0.0001         | -1165.788246        |                     |
| CO-Co-Co-CO | 0         | 0              | 0                   | -1181.455072        |
|             | 0         | 1              | 0.9236              | -1181.711819        |
|             | 0         | -1             | 0                   | -1181.454727        |
|             | 1.5       | 1.5            | -0.1030             | -1181.918890        |
|             | 1         | 1              | -1.5643             | -1181.937811        |
|             | -1        | 1              | -1.5684             | -1181.938623        |
|             | -1        | -1             | -0.9111             | -1181.709745        |
|             | <b>1</b>  | <b>-1</b>      | <b>1.5682</b>       | <b>-1181.938808</b> |
| Mn-Mn       | 1         | 1              | 1.9987              | -1154.413259        |
|             | 1         | 3              | 6.4572              | -1155.226760        |
|             | 1         | -3             | -4.0181             | -1154.180907        |
|             | -1        | 3              | 2.0002              | -1154.440667        |
|             | -1        | -3             | -1.9976             | -1154.290648        |
|             | 3         | 3              | 5.9993              | -1155.555028        |
|             | 3         | -3             | 0.0468              | -1155.218760        |
|             | -3        | 3              | -0.0594             | -1155.217258        |
|             | -3.5      | 3.5            | 0                   | -1155.556404        |
|             | <b>4</b>  | <b>-4</b>      | <b>0</b>            | <b>-1155.556406</b> |
|             | 4         | 4              | 6.0768              | -1155.216420        |
|             | -4        | -4             | -5.9993             | -1155.555057        |
| 3.5         | -3.5      | 1.9886         | -1155.296437        |                     |
| -3          | 3         | -4.0071        | -1170.690779        |                     |
| <b>-1</b>   | <b>1</b>  | <b>-1.9956</b> | <b>-1170.693349</b> |                     |



|             |          |           |               |                     |
|-------------|----------|-----------|---------------|---------------------|
|             | 3        | 3         | 4.0652        | -1170.354783        |
| Mn-Mn-CO    | 3        | 1         | 3.9599        | -1169.605413        |
|             | 3        | -1        | 4.0070        | -1170.690406        |
|             | 3.5      | 3.5       | 1.9956        | -1170.693246        |
| <hr/>       |          |           |               |                     |
|             | 1        | 1         | 2.0195        | -1185.805073        |
|             | <b>1</b> | <b>-1</b> | <b>0.0001</b> | <b>-1185.806909</b> |
|             | 3        | 3         | 0             | -1185.805558        |
| CO-Mn-Mn-CO | 3        | -3        | -2.0196       | -1185.803323        |
|             | -3       | 3         | -1.1051       | -1185.006046        |
|             | -3       | -3        | 2.0196        | -1185.803825        |
|             | 3.5      | 3.5       | 0.0001        | -1185.805662        |
|             | 3.5      | -3.5      | 2.0196        | -1185.804028        |
| <hr/>       |          |           |               |                     |
|             | 1        | 1         | 6.0067        | -1154.265948        |
|             | 1        | -1        | -0.0019       | -1153.084754        |
|             | -1       | -1        | -5.9707       | -1154.537012        |
|             | 1        | 3         | 5.9697        | -1154.536408        |
|             | 2.5      | -2.5      | 0             | -1153.356919        |
| V-V         | -2.5     | 2.5       | 0             | -1152.789698        |
|             | 3        | 3         | 2.0001        | -1153.115004        |
|             | -3.5     | 3.5       | -2.0074       | -1153.775550        |
|             | <b>4</b> | <b>-4</b> | <b>0</b>      | <b>-1154.538355</b> |
|             | -4       | -4        | -5.9696       | -1154.537090        |
|             | 3        | -3        | -1.9178       | -1153.812161        |
| <hr/>       |          |           |               |                     |
|             | 1        | 1         | 6.0182        | -1170.572496        |
|             | -1       | 1         | 0.0426        | -1170.570374        |
|             | -1       | -1        | -2.0007       | -1169.271272        |
| V-V-CO      | 3        | 1         | 2.0065        | -1169.199973        |
|             | -3       | 1         | 0.0190        | -1170.247352        |
|             | <b>3</b> | <b>3</b>  | <b>6.0187</b> | <b>-1170.572679</b> |
|             | -3       | 3         | -1.9982       | -1169.714200        |
| <hr/>       |          |           |               |                     |
|             | 1        | 1         | 2.0094        | -1185.271739        |
|             | 1        | -1        | -0.0018       | -1185.274327        |
|             | -1       | -1        | -2.0047       | -1185.106491        |
| CO-V-V-CO   | 2.5      | 2.5       | 5             | -1186.359846        |
|             | -2.5     | -2.5      | -6.0419       | -1186.509764        |
|             | 1        | 3         | 4.0174        | -1185.807059        |
|             | <b>1</b> | <b>-3</b> | <b>0.0007</b> | <b>-1186.510123</b> |
|             | 3        | 3         | 2.0047        | -1185.106754        |
|             | 3        | -3        | 0.0008        | -1186.509354        |
| <hr/>       |          |           |               |                     |
|             | 1        | 1         | 6.0006        | -1152.410790        |
|             | <b>1</b> | <b>-1</b> | <b>0</b>      | <b>-1152.414264</b> |
|             | 1        | 3         | 2.9295        | -1151.452757        |

|             |           |           |                |                     |
|-------------|-----------|-----------|----------------|---------------------|
| Tc-Tc       | 1         | -3        | -1.9974        | -1151.154474        |
|             | -1        | 3         | 4.0101         | -1151.464120        |
|             | 3         | 3         | 6.0006         | -1152.410790        |
|             | 3         | -3        | 0              | -1152.414264        |
| Tc-Tc-CO    | -3        | 2         | 2.0011         | -1168.457076        |
|             | -1        | 1         | 1.0808         | -1167.992555        |
|             | 3         | 1         | 3.9996         | -1168.448803        |
|             | -3        | 1         | -2.0011        | -1168.456688        |
|             | 3         | -1        | -2.0083        | -1168.368381        |
|             | -3        | 1.5       | 2.0076         | -1168.360158        |
|             | 3         | -2        | 2              | -1168.356090        |
|             | 3         | 1.5       | 3.9997         | -1168.454337        |
|             | <b>3</b>  | <b>2</b>  | <b>4.0060</b>  | <b>-1168.992554</b> |
|             | 3         | 3         | 0.0075         | -1168.358153        |
|             | -3.5      | 2         | 2.0077         | -1168.360238        |
|             | -3        | 2         | 1.9220         | -1168.170760        |
|             | 3.5       | -1.5      | 3.9997         | -1168.454337        |
|             | 3.5       | -2        | -2.0076        | -1168.360149        |
| -3.5        | 1.5       | 2.0076    | -1168.360155   |                     |
| -3          | 3         | 2.0077    | -1168.360008   |                     |
| CO-Tc-Tc-CO | 1         | 1         | 2.0059         | -1185.459544        |
|             | 1         | -1        | 0              | -1185.459676        |
|             | 1         | 3         | 2.0012         | -1184.910739        |
|             | 1         | -3        | -0.0006        | -1184.910956        |
|             | <b>-1</b> | <b>3</b>  | <b>0</b>       | <b>-1185.460063</b> |
|             | 3         | 3         | 0              | -1185.459869        |
| 3           | -3        | 2.0058    | -1185.459490   |                     |
| W-W         | 3         | 3         | 6.7908         | -1155.361640        |
|             | -3        | 3         | 1.1217         | -1155.347108        |
|             | 3         | -3        | -1.1274        | -1155.347866        |
|             | <b>-3</b> | <b>-3</b> | <b>-6.7907</b> | <b>-1155.361644</b> |
| 4           | -4        | 0         | -1155.319811   |                     |
| W-W-CO      | 3         | 3         | 4.4776         | -1172.522192        |
|             | -3        | 3         | -0.2559        | -1172.529987        |
|             | <b>3</b>  | <b>-3</b> | <b>0.2545</b>  | <b>-1172.530095</b> |
|             | -3        | -3        | -4.4747        | -1172.521880        |
| 4           | 3         | 5         | -1172.514720   |                     |
| CO-W-W-CO   | 2         | 2         | 4.0058         | -1189.482517        |
|             | <b>2</b>  | <b>-2</b> | <b>-0.0001</b> | <b>-1189.487674</b> |
|             | -2        | 2         | 0.0001         | -1189.487674        |
|             | -2        | -2        | -4.0057        | -1189.482516        |
|             | <b>0</b>  | <b>4</b>  | <b>-0.0003</b> | <b>-1157.087232</b> |

|             |           |           |                |                     |
|-------------|-----------|-----------|----------------|---------------------|
| Cr-Cr       | 2         | 2         | 8.0473         | -1157.086264        |
|             | 2         | -2        | 0.0003         | -1157.087228        |
|             | -2        | -2        | -8.0473        | -1157.086265        |
| Cr-Cr-CO    | 2         | 0         | 7.9282         | -1172.169468        |
|             | -2        | 0         | -4.0139        | -1171.440689        |
|             | 4         | 0         | 6.0534         | -1170.964212        |
|             | -4        | 0         | -6.0386        | -1171.978653        |
|             | 0         | -2        | 0.1136         | -1172.173292        |
|             | <b>-2</b> | <b>2</b>  | <b>-0.1174</b> | <b>-1172.173970</b> |
|             | -2        | -2        | -7.9255        | -1172.170343        |
| 0           | -4        | -5.9199   | -1170.857868   |                     |
| CO-Cr-Cr-CO | 4         | 4         | 7.8178         | -1187.249174        |
|             | <b>4</b>  | <b>-4</b> | <b>-0.0210</b> | <b>-1187.249916</b> |
|             | -4        | 4         | 0.0205         | -1187.249914        |
|             | -4        | -4        | -7.8191        | -1187.248600        |
| Fe-Fe       | 0         | 0         | 0              | -1152.282678        |
|             | 0         | 2         | 0              | -1153.445672        |
|             | 0         | 4         | 2.0002         | -1152.690098        |
|             | 2         | 2         | 3.9976         | -1152.559846        |
|             | <b>2</b>  | <b>-2</b> | <b>0</b>       | <b>-1153.445760</b> |
|             | 4         | 4         | 4.0032         | -1153.444863        |
|             | 4         | -4        | -2.0013        | -1152.864206        |
| 4.5         | 4.5       | 4.0032    | -1153.444769   |                     |
| Fe-Fe-CO    | 0         | 0         | 0.0001         | -1168.360415        |
|             | 2         | 0         | 2.0015         | -1168.942406        |
|             | <b>4</b>  | <b>0</b>  | <b>2.0015</b>  | <b>-1168.942680</b> |
|             | 2         | 2         | 0.0661         | -1168.583678        |
|             | 4         | 4         | -0.0001        | -1168.360463        |
|             | -4        | 4         | -2.0015        | -1168.942650        |
| CO-Fe-Fe-CO | 0         | 0         | -1.9674        | -1184.081750        |
|             | 0         | 2         | -1.9731        | -1184.084324        |
|             | <b>0</b>  | <b>4</b>  | <b>0</b>       | <b>-1184.434930</b> |
|             | 2         | 2         | -1.9703        | -1184.082775        |
|             | 2         | -2        | 1.9676         | -1184.082471        |
|             | 4         | 4         | 0              | -1184.434763        |
|             | 4         | -4        | 0              | -1184.433908        |
| Ru-Ru       | 0         | 0         | -1.3807        | -1150.348760        |
|             | 0         | 2         | -1.8735        | -1150.457782        |
|             | 0         | 4         | -1.4928        | -1150.273319        |
|             | 2         | 2         | 0.0164         | -1150.261645        |
|             | 2         | -2        | -0.0908        | -1150.737550        |
|             | 4         | 4         | 3.9968         | -1150.882611        |

|             |            |             |                |                     |
|-------------|------------|-------------|----------------|---------------------|
|             | <b>4</b>   | <b>-4</b>   | <b>-0.0012</b> | <b>-1150.885542</b> |
|             | 0          | 0           | 0.0001         | -1167.208560        |
|             | 2          | 0           | -2.0058        | -1167.835086        |
|             | <b>4</b>   | <b>0</b>    | <b>2.0056</b>  | <b>-1167.836398</b> |
| Ru-Ru-CO    | 2          | 2           | -2.0058        | -1167.835588        |
|             | -2         | 2           | 2.0058         | -1167.835248        |
|             | 4          | 4           | 2.0058         | -1167.835884        |
|             | -4         | 4           | -2.0058        | -1167.834925        |
|             | 0          | 0           | 0              | -1184.737287        |
|             | 0          | 2           | 0              | -1184.737321        |
| CO-Ru-Ru-CO | 0          | 4           | 0              | -1184.737290        |
|             | <b>2</b>   | <b>2</b>    | <b>0</b>       | <b>-1184.737535</b> |
|             | 2          | -2          | 0              | -1184.737168        |
|             | 0          | 0           | 0.0010         | -1151.289444        |
|             | 0          | 2           | 3.9163         | -1152.225853        |
|             | 0          | 4           | -0.0108        | -1153.183617        |
| Mo-Mo       | 2          | -2          | 0.0120         | -1153.183514        |
|             | 3.5        | 3.5         | 7.8053         | -1153.178038        |
|             | <b>3.5</b> | <b>-3.5</b> | <b>-0.0038</b> | <b>-1153.186357</b> |
|             | 4          | 4           | 7.8107         | -1153.174621        |
|             | 4          | -4          | 0.0073         | -1153.182792        |
|             | 2          | 0           | -0.0104        | -1168.065043        |
|             | 4          | 0           | -0.0102        | -1168.065545        |
| Mo-Mo-CO    | 2          | 2           | -0.0076        | -1168.243169        |
|             | -2         | 2           | -0.0076        | -1168.243423        |
|             | 4          | 4           | 5.9780         | -1169.458830        |
|             | <b>-4</b>  | <b>4</b>    | <b>-1.9574</b> | <b>-1169.459620</b> |
|             | 0          | 0           | 0              | -1185.188364        |
|             | 0          | 2           | 0.0001         | -1185.192093        |
|             | 0          | 4           | 0              | -1185.730255        |
| CO-Mo-Mo-CO | 2          | 2           | 2.0009         | -1185.460233        |
|             | 2          | -2          | 0              | -1185.730635        |
|             | 4          | 4           | 4.0017         | -1185.728223        |
|             | <b>4</b>   | <b>-4</b>   | <b>0</b>       | <b>-1185.730878</b> |
|             | <b>3.5</b> | <b>1</b>    | <b>1.9980</b>  | <b>-1153.352506</b> |
|             | 3.5        | -1          | 3.9983         | -1153.340769        |
|             | -3.5       | 1           | -3.0491        | -1152.766370        |
| Mn-Co       | 3.5        | 1.5         | 4              | -1152.988152        |
|             | -3.5       | -2          | -2.970         | -1152.764887        |
|             | 4          | 2           | 3.722          | -1152.807044        |
|             | 3.5        | 1           | -1.0213        | -1167.878097        |
|             | 3.5        | -1          | -1.0215        | -1167.877996        |

|             |            |            |                |                     |
|-------------|------------|------------|----------------|---------------------|
|             | -3.5       | 1          | 1.0216         | -1167.878003        |
|             | -3.5       | -1         | 1.0216         | -1167.878051        |
| CO-Mn-Co    | <b>1.5</b> | <b>1</b>   | <b>2</b>       | <b>-1168.482298</b> |
|             | 1.5        | -1         | 0.5000         | -1168.449354        |
|             | -1.5       | 1          | -2.0100        | -1168.470501        |
|             | 2          | -2         | 0.0120         | -1168.471103        |
|             | -2         | 2          | -1.0183        | -1167.840477        |
| <hr/>       |            |            |                |                     |
|             | 3.5        | 1          | 2.2565         | -1168.420749        |
| Mn-Co-CO    | <b>3.5</b> | <b>-1</b>  | <b>3.8130</b>  | <b>-1168.743126</b> |
|             | -3.5       | 1          | -3.8120        | -1168.743050        |
|             | -3.5       | -1         | -2.2451        | -1168.730953        |
|             | 4          | -1         | 3.8313         | -1168.743107        |
|             | -4         | 1          | -2.2468        | -1168.730808        |
| <hr/>       |            |            |                |                     |
|             | 3.5        | 1          | 1.0286         | -1183.671229        |
|             | 3.5        | -1         | 1.0291         | -1183.670249        |
|             | -3.5       | 1          | -1.0293        | -1183.671252        |
|             | -3.5       | -1         | -1.0293        | -1183.671252        |
| CO-Mn-Co-CO | 1.5        | 1          | 2              | -1183.865765        |
|             | <b>1.5</b> | <b>-1</b>  | <b>0.5000</b>  | <b>-1183.866282</b> |
|             | -1.5       | 1          | -0.3303        | -1183.866073        |
|             | 2          | 2          | -1.0287        | -1183.671313        |
|             | 2          | -2         | 0.6287         | -1183.047878        |
|             | -2         | 2          | 1.029          | -1183.671114        |
| <hr/>       |            |            |                |                     |
|             | 4          | 3.5        | 0.9941         | -1155.001173        |
|             | 4          | -3.5       | 0.9674         | -1155.989764        |
| Cr-Mn       | <b>-4</b>  | <b>3.5</b> | <b>-1.0173</b> | <b>-1156.323699</b> |
|             | 4          | 4          | 7              | -1156.321960        |
|             | -4         | -4         | -0.9937        | -1155.074507        |
|             | -4.5       | -4         | 1.0182         | -1156.323684        |
|             | -4         | -3.5       | -2.9996        | -1154.570850        |
| <hr/>       |            |            |                |                     |
|             | 4          | 3.5        | -0.9512        | -1171.402261        |
|             | 4          | -3.5       | 0.9512         | -1171.402259        |
|             | -4         | 3.5        | -0.9538        | -1171.402831        |
| CO-Cr-Mn    | <b>4</b>   | <b>4</b>   | <b>7</b>       | <b>-1171.404395</b> |
|             | -4         | -4         | 0.9534         | -1171.402867        |
|             | 4.5        | 4          | -0.9535        | -1171.402865        |
|             | -4.5       | -4         | 0.9535         | -1171.402866        |
|             | -4         | -3.5       | 0.9514         | -1171.402385        |
| <hr/>       |            |            |                |                     |
|             | 4          | 3.5        | 4.0179         | -1170.682577        |
|             | 4          | -3.5       | 2.9876         | -1171.455090        |
|             | 4.5        | -3.5       | 2.9877         | -1171.454994        |
| Cr-Mn-CO    | 4          | -3         | 5.0369         | -1171.456990        |

|             |             |             |                |                     |
|-------------|-------------|-------------|----------------|---------------------|
|             | -4          | 3           | -2.9876        | -1171.454887        |
|             | -4          | 1.5         | 2.9353         | -1170.940179        |
|             | 4           | -2          | 2.9354         | -1170.939882        |
|             | -4          | 3.5         | -5.0369        | -1171.456699        |
|             | <b>-4</b>   | <b>-3.5</b> | <b>-5.0368</b> | <b>-1171.457115</b> |
| <hr/>       |             |             |                |                     |
| CO-Cr-Mn-CO | 4           | 3.5         | 3.8651         | -1185.762092        |
|             | 4           | -3.5        | 2.9158         | -1186.528923        |
|             | <b>-4</b>   | <b>3.5</b>  | <b>-4.9768</b> | <b>-1186.531645</b> |
|             | -4          | -3.5        | -4.9776        | -1186.531171        |
| <hr/>       |             |             |                |                     |
| Cr-Co       | 4           | 1           | 3.0084         | -1152.865081        |
|             | 4           | 1.5         | 5.0106         | -1154.118284        |
|             | 4           | -1          | 3.0091         | -1152.765153        |
|             | -4          | 1           | -5.0172        | -1154.128493        |
|             | 4.5         | 2           | 5.0107         | -1154.118574        |
|             | 4           | -2          | 5.0106         | -1154.118366        |
|             | <b>-4</b>   | <b>-1</b>   | <b>-3.0188</b> | <b>-1154.128960</b> |
| <hr/>       |             |             |                |                     |
| CO-Cr-Co    | 4           | 1           | 3.9552         | -1168.665236        |
|             | <b>4</b>    | <b>-1</b>   | <b>2.9396</b>  | <b>-1169.206850</b> |
|             | -4          | 1           | -4.9346        | -1169.206066        |
|             | -4          | -1          | -2.9502        | -1169.195961        |
| <hr/>       |             |             |                |                     |
| Cr-Co-CO    | 4           | 1           | 4.7163         | -1169.516824        |
|             | <b>4</b>    | <b>-1</b>   | <b>3.2861</b>  | <b>-1169.523575</b> |
|             | -4          | 1           | -3.2852        | -1169.523500        |
|             | -4          | -1          | -4.7163        | -1169.515914        |
| <hr/>       |             |             |                |                     |
| CO-Cr-Co-CO | 4           | 1           | 4.6590         | -1184.600282        |
|             | <b>4</b>    | <b>-1</b>   | <b>3.2354</b>  | <b>-1184.602893</b> |
|             | -4          | 1           | -3.2362        | -1184.602620        |
|             | -4          | -1          | -4.6578        | -1184.599731        |
| <hr/>       |             |             |                |                     |
| V-Co        | 3           | 1           | 3.9877         | -1152.854747        |
|             | <b>3</b>    | <b>-1</b>   | <b>1.9885</b>  | <b>-1152.855313</b> |
|             | -3          | 1           | -3.9869        | -1152.854656        |
|             | -3          | -1          | -3.9870        | -1152.854802        |
| <hr/>       |             |             |                |                     |
| CO-V-Co     | 3           | 1           | 3.0203         | -1168.269339        |
|             | 3           | -1          | 4.0210         | -1168.842270        |
|             | -3          | 1           | -0.0058        | -1168.246239        |
|             | -3          | -1          | -3.0204        | -1168.269367        |
|             | 2.5         | -1          | 1.5000         | -1167.982597        |
|             | <b>-2.5</b> | <b>1.5</b>  | <b>-4.0210</b> | <b>-1168.842479</b> |
|             | 3           | -1.5        | 4.0211         | -1168.842425        |
|             | -2.5        | 1           | 0.0081         | -1168.297720        |
|             | 4           | -2          | 2              | -1168.830395        |
|             | -4          | 2           | -3.0216        | -1168.269233        |

|             |             |           |                |                     |
|-------------|-------------|-----------|----------------|---------------------|
|             | -2.5        | 1         | 0.0081         | -1168.297720        |
| V-Co-CO     | 3           | 1         | 0.2013         | -1167.486352        |
|             | <b>3</b>    | <b>-1</b> | <b>2.2238</b>  | <b>-1168.248200</b> |
|             | -3          | 1         | -3.7162        | -1168.239760        |
|             | -3          | -1        | -0.2846        | -1167.525876        |
| CO-V-Co-CO  | 3           | 1         | 3.8117         | -1184.219554        |
|             | 3           | -1        | 0.2740         | -1183.674874        |
|             | -3          | 1         | -2.9719        | -1184.019771        |
|             | -3          | -1        | -0.2948        | -1183.683241        |
|             | <b>-2.5</b> | <b>1</b>  | <b>-2.2968</b> | <b>-1184.226064</b> |
|             | <b>2.5</b>  | <b>-1</b> | <b>2.2968</b>  | <b>-1184.226065</b> |
| Mo-Mn       | 3.5         | 3.5       | 6.5000         | -1154.392654        |
|             | 3.5         | -3.5      | 0              | -1154.334834        |
|             | -3.5        | -3.5      | -6.9792        | -1154.078110        |
|             | -3.5        | 3.5       | 0              | -1154.334727        |
|             | 4           | 4         | 2.9903         | -1153.460907        |
|             | <b>-4</b>   | <b>-4</b> | <b>-6.9576</b> | <b>-1154.410266</b> |
| CO-Mo-Mn    | 2           | 3.5       | 5              | -1170.683298        |
|             | 2           | -3.5      | -3             | -1170.413168        |
|             | -2          | 3.5       | 1.5000         | -1170.631434        |
|             | -2          | -3.5      | -5.0013        | -1170.683261        |
|             | 2           | 4         | 5.0015         | -1170.683317        |
|             | -2          | 4         | 0.9992         | -1170.685478        |
|             | <b>2</b>    | <b>-4</b> | <b>-0.9989</b> | <b>-1170.685481</b> |
| Mo-Mn-CO    | 3.5         | 1.5       | 5              | -1169.526418        |
|             | 3.5         | -1.5      | 2              | -1169.437810        |
|             | -3.5        | 1.5       | -4.9874        | -1169.526491        |
|             | <b>4</b>    | <b>2</b>  | <b>4.9872</b>  | <b>-1169.526518</b> |
|             | 4           | -2        | -1.0087        | -1168.525103        |
|             | -4          | 2         | 2.9309         | -1169.520565        |
| CO-Mo-Mn-CO | 2           | 1.5       | 3              | -1185.786167        |
|             | 2           | -1.5      | 0.5000         | -1185.460335        |
|             | -2          | 1.5       | 3.0069         | -1185.785847        |
|             | 2           | -2        | -0.9985        | -1185.787276        |
|             | <b>-2</b>   | <b>2</b>  | <b>0.9988</b>  | <b>-1185.787302</b> |
|             | -2          | -1.5      | 0.9988         | -1185.787294        |
| Mo-Co       | 3.5         | 1         | 4.9487         | -1152.196419        |
|             | <b>3.5</b>  | <b>-1</b> | <b>2.9454</b>  | <b>-1152.208392</b> |
|             | -3.5        | 1         | -2.9357        | -1152.194518        |
| CO-Mo-Co    | 2           | 1         | 1.0026         | -1168.469770        |
|             | 2           | -1        | 1.0025         | -1168.469979        |
|             | <b>-2</b>   | <b>1</b>  | <b>-3.0036</b> | <b>-1168.472527</b> |

|             |            |            |                |                     |
|-------------|------------|------------|----------------|---------------------|
|             | 3.5        | 1          | 4              | -1167.548853        |
|             | 3.5        | -1         | -0.9190        | -1166.576133        |
| Mo-Co-CO    | <b>4</b>   | <b>1.5</b> | <b>3.2320</b>  | <b>-1167.596134</b> |
|             | 4          | -1.5       | 1.2141         | -1166.704483        |
|             | 4          | -2         | -4.6342        | -1167.590276        |
|             | <b>2</b>   | <b>1</b>   | <b>2.8080</b>  | <b>-1183.846065</b> |
| CO-Mo-Co-CO | 2          | -1         | 1.2828         | -1183.840799        |
|             | -2         | 1          | -1.2828        | -1183.842950        |
|             | 3.5        | 3          | 6.9229         | -1153.869638        |
|             | 3.5        | -3         | -3.0093        | -1152.867802        |
| Mo-V        | -4         | 3          | -0.9416        | -1153.872026        |
|             | <b>4</b>   | <b>-3</b>  | <b>1</b>       | <b>-1153.872467</b> |
|             | -3.5       | -3         | -6.9210        | -1153.870077        |
|             | <b>2</b>   | <b>3</b>   | <b>4.9995</b>  | <b>-1170.146541</b> |
| CO-Mo-V     | 2          | -3         | -0.9887        | -1170.145369        |
|             | -2         | 3          | 0.9891         | -1170.145256        |
|             | -2         | -3         | -4.9997        | -1170.146379        |
|             | <b>3.5</b> | <b>2.5</b> | <b>6.9913</b>  | <b>-1169.858776</b> |
| Mo-V-CO     | 3.5        | -2.5       | 0.9131         | -1169.858348        |
|             | -3.5       | 2.5        | -0.9137        | -1169.856397        |
|             | -3.5       | -2.5       | -4.9777        | -1169.316566        |
|             | 2          | 2.5        | 5.0128         | -1186.123930        |
| CO-Mo-V-CO  | 2          | -2.5       | -1.0035        | -1186.125627        |
|             | <b>-2</b>  | <b>2.5</b> | <b>1.0036</b>  | <b>-1186.126519</b> |
|             | -2         | -2.5       | -5.0128        | -1186.124745        |
|             | 3          | 1          | -1.9983        | -1151.164690        |
|             | 3          | -1         | 2.0007         | -1151.118358        |
|             | -3         | 1          | 1.9982         | -1151.164615        |
|             | -3         | -1         | 1.9997         | -1151.174070        |
|             | 3.5        | 1          | 4              | -1151.353874        |
|             | 3.5        | -1         | 2              | -1151.528391        |
| Tc-Co       | -3.5       | 1          | 1.0526         | -1150.564336        |
|             | -3.5       | -1         | 1.0528         | -1150.564831        |
|             | 3.5        | 1.5        | -0.9689        | -1150.581756        |
|             | -3.5       | -1.5       | 0.9655         | -1150.592622        |
|             | 4          | 1          | -0.9793        | -1150.583004        |
|             | -4         | -1         | -0.0003        | -1151.161199        |
|             | <b>4</b>   | <b>2</b>   | <b>4</b>       | <b>-1151.806006</b> |
|             | -4         | -2         | -2.9668        | -1151.227435        |
|             | 4          | 1.5        | 2.9953         | -1151.228814        |
|             | -4         | -1.5       | -0.9943        | -1150.605862        |
|             | <b>3</b>   | <b>1</b>   | <b>-2.0052</b> | <b>-1168.319707</b> |



|             |            |          |                |                     |
|-------------|------------|----------|----------------|---------------------|
|             | 3          | -1       | 1.0111         | -1167.736313        |
|             | -3         | 1        | -1.0063        | -1167.725075        |
|             | -3         | -1       | -1.0063        | -1167.725123        |
|             | 1          | 1        | 2              | -1168.309243        |
|             | 1          | -1       | 0              | -1167.605685        |
|             | -1         | 1        | 0              | -1167.579720        |
| CO-Tc-Co    | 1.5        | 1        | 2              | -1167.565183        |
|             | 1.5        | -1       | 0              | -1167.063588        |
|             | 1.5        | 1.5      | -1.0064        | -1167.724477        |
|             | 1.5        | -1.5     | 1.0063         | -1167.724764        |
|             | -1.5       | 1.5      | -1.0102        | -1167.735985        |
|             | 2          | 2        | 1.0062         | -1167.724861        |
|             | 2          | -2       | -1.0063        | -1167.724986        |
|             | 2.5        | -2.5     | 0              | -1168.309659        |
|             | -2.5       | 2.5      | 0              | -1168.319574        |
|             | -2         | 2        | 1.0063         | -1167.725367        |
|             | 3          | 1        | -0.2552        | -1166.494427        |
|             | 3          | -1       | -2.0942        | -1166.419676        |
|             | -3         | 1        | 3.7490         | -1167.196370        |
|             | -3         | -1       | 0.2530         | -1166.494246        |
|             | <b>3.5</b> | <b>1</b> | <b>-3.7497</b> | <b>-1167.196762</b> |
| Tc-Co-CO    | 3.5        | -1       | 2              | -1166.516352        |
|             | -3.5       | 1        | 2              | -1166.864863        |
|             | 4          | -1       | -0.2568        | -1166.54605         |
|             | -4         | 1        | 0.2566         | -1166.546123        |
|             | 4          | -1.5     | -3.7497        | -1167.196758        |
|             | 4          | -2       | 2              | -1167.191339        |
|             | -4         | 2        | 1.7405         | -1166.547428        |
|             | -4         | 1.5      | 3.7496         | -1167.196722        |
|             | 3          | 1        | 1.0108         | -1183.527119        |
|             | <b>1</b>   | <b>1</b> | <b>2</b>       | <b>-1183.709548</b> |
| CO-Tc-Co-CO | 1          | -1       | 0              | -1183.708786        |
|             | -1         | 1        | 0              | -1183.707130        |
|             | -1         | -1       | 1.7168         | -1183.708857        |
|             | 3          | 3        | 4.1049         | -1152.821334        |
|             | 3          | -3       | -4.2960        | -1152.688399        |
|             | -3         | 3        | 3.9890         | -1152.875540        |
|             | -3         | -3       | -3.9838        | -1152.803385        |
|             | 3.5        | 3        | 6              | -1153.188628        |
| Tc-V        | 3.5        | -3       | 0              | -1152.080370        |
|             | -3.5       | 3        | 0              | -1152.425949        |
|             | 4          | 4        | 1.9828         | -1152.851158        |

|            |            |            |               |                     |
|------------|------------|------------|---------------|---------------------|
|            | 4          | -4         | 0.2100        | -1152.333751        |
|            | <b>-4</b>  | <b>4</b>   | <b>5.9787</b> | <b>-1153.482078</b> |
|            | -4         | -4         | -1.9867       | -1152.835609        |
|            | -3.5       | -3         | -1.9822       | -1152.851374        |
|            | <b>3</b>   | <b>3</b>   | <b>3.9908</b> | <b>-1170.063499</b> |
| CO-Tc-V    | 3          | -3         | -1.9777       | -1170.062145        |
|            | -3         | 3          | 3.9908        | -1170.062973        |
|            | -3         | -3         | -2.0541       | -1169.336007        |
|            | 3          | 3          | 4.0269        | -1168.809359        |
|            | 3          | -3         | -4.0173       | -1168.846113        |
|            | -3         | 3          | 4.0178        | -1168.848823        |
| Tc-V-CO    | 3          | 2.5        | 6             | -1169.208662        |
|            | -3         | 2.5        | 0             | -1168.378467        |
|            | 4          | 4          | 2.0155        | -1168.845561        |
|            | 4          | -4         | 0.5310        | -1168.106855        |
|            | -4         | 4          | 4.0213        | -1168.847959        |
|            | <b>-4</b>  | <b>-4</b>  | <b>5.3320</b> | <b>-1169.426175</b> |
|            | -3         | -2.5       | -2.0216       | -1168.847782        |
|            | <b>2</b>   | <b>2.5</b> | <b>4</b>      | <b>-1185.987889</b> |
|            | 2          | -2.5       | -4.0210       | -1185.985555        |
| CO-Tc-V-CO | -1         | 2.5        | 1.5           | -1185.946651        |
|            | 1.5        | -2.5       | -4.0211       | -1185.987492        |
|            | 2          | -3         | -2.0137       | -1185.987550        |
|            | -2         | 3          | 2.0137        | -1185.987550        |
|            | n-layer    |            |               |                     |
|            | 3          | 3          | 6             | -895.6121007        |
|            | <b>3</b>   | <b>-3</b>  | <b>0</b>      | <b>-895.6268769</b> |
| Tc-Tc      | 1          | 1          | 0.0001        | -895.6265081        |
| 2layer     | 1          | -1         | 0.0001        | -895.6260195        |
|            | 1          | 3          | 6             | -895.6123609        |
|            | 1          | -3         | -0.0001       | -895.6258701        |
|            | -1         | 3          | 0.0002        | -895.6203083        |
|            | 2          | 3          | 4             | -912.0284619        |
|            | 1          | 3          | 4             | -912.0284977        |
|            | 1          | -3         | -1.9947       | -912.0285739        |
| Tc-Tc-CO   | -1         | 3          | 1.9945        | -912.0282449        |
| 2layer     | 1.5        | 3          | 4             | -912.0284978        |
|            | <b>1.5</b> | <b>-3</b>  | <b>3.9977</b> | <b>-912.0289443</b> |
|            | 1.5        | 3.5        | 4             | -912.0284978        |
|            | -2         | 3          | 1             | -911.2065307        |
|            | <b>2</b>   | <b>-2</b>  | <b>0</b>      | <b>-928.3518415</b> |
|            | 1          | 1          | 2             | -928.3516860        |

|             |           |             |                |                     |
|-------------|-----------|-------------|----------------|---------------------|
| CO-Tc-Tc-CO | -1        | -1          | 1.0714         | -927.6092389        |
| 2layer      | 1         | -1          | 0              | -928.3518205        |
|             | -1        | 1           | 0              | -928.3518123        |
|             | 2         | 2           | -2.0031        | -928.3516559        |
|             | 3         | 3           | 6              | -1362.151811        |
| Tc-Tc       | 1         | 1           | 1.9830         | -1361.495489        |
| 3layer      | 1         | -1          | 1.9893         | -1361.510485        |
|             | -1        | 1           | -1.9893        | -1361.510361        |
|             | 3         | -3          | 0              | -1362.172040        |
|             | <b>-3</b> | <b>3</b>    | <b>0</b>       | <b>-1362.172642</b> |
|             | 1         | 3           | 4              | -1377.436963        |
|             | 1         | -3          | 2              | -1377.888935        |
|             | 1         | -3          | 0.1438         | -1377.898672        |
|             | 2         | 3           | 1.9141         | -1377.900442        |
|             | 3         | 3           | 4              | -1377.482568        |
| Tc-Tc-CO    | 1         | 3.5         | 4              | -1377.435526        |
| 3layer      | <b>1</b>  | <b>-3.5</b> | <b>3.9631</b>  | <b>-1378.572942</b> |
|             | 2         | 3.5         | 4              | -1377.437715        |
|             | 3.5       | 3.5         | 5              | -1378.464838        |
|             | -1        | 4           | 2.0002         | -1377.893473        |
|             | 1         | -4          | 2.1375         | -1377.930645        |
|             | -2        | 4           | 2              | -1377.893432        |
|             | -4        | 4           | -2.1293        | -1377.930537        |
|             | 4         | -4          | 2.1274         | -1377.930800        |
|             | 3         | 3.5         | 6              | -1378.113747        |
|             | 1         | 1           | 2              | -1394.944361        |
| Tc-Tc-CO    | 1         | -1          | 0              | -1394.944349        |
| 3layer      | <b>-1</b> | <b>1</b>    | <b>0</b>       | <b>-1394.944610</b> |
|             | -1        | -1          | 2.0359         | -1394.944453        |
|             | 2         | 2           | -2.0360        | -1394.944438        |
|             | 2         | -2          | -0.0004        | -1394.944376        |
|             | 3.6       | 2.5         | 3.9884         | -898.2542539        |
|             | 3.7       | 3.7         | 5.9954         | -898.6709116        |
| Cr-Cr       | 4         | 4           | 7.9866         | -899.9699414        |
| 2layer      | 4         | -4          | 0.0001         | -899.9835608        |
|             | <b>-4</b> | <b>4</b>    | <b>-0.0001</b> | <b>-899.9840675</b> |
|             | -4        | -4          | -7.9864        | -899.9698363        |
|             | 4.5       | 4.5         | 7.9865         | -899.9698507        |
|             | 3         | 2.1         | -0.0043        | -914.9945790        |
|             | 2.5       | 2           | 3.9918         | -914.2546656        |
|             | 3         | 2           | 6.0334         | -914.8068455        |
|             | 2         | 3.6         | 7.9867         | -914.9882781        |

|             |            |             |                |                     |
|-------------|------------|-------------|----------------|---------------------|
|             | 2.5        | 3.6         | -0.0043        | -914.9941991        |
| Cr-Cr-CO    | 3          | 3.6         | 7.9868         | -914.9883318        |
| 2layer      | 3.7        | 3.7         | 7.9866         | -914.9882507        |
|             | 4          | 4           | -0.0038        | -914.9934445        |
|             | -4         | 4           | -1.9652        | -914.7964836        |
|             | 4          | -4          | 1.9641         | -914.7983284        |
|             | <b>-4</b>  | <b>-4</b>   | <b>0.0043</b>  | <b>-914.9946076</b> |
|             | 4          | 4           | -4.0009        | -929.2546568        |
|             | 4          | -4          | 0              | -928.4992473        |
| CO-Cr-Cr-CO | -4         | 4           | -4.0013        | -929.2564811        |
| 2layer      | -4         | -4          | 4.0008         | -929.2553971        |
|             | 4.5        | 4.5         | 7.9934         | -929.9985889        |
|             | <b>4.5</b> | <b>-4.5</b> | <b>0.0012</b>  | <b>-930.0007764</b> |
|             | 4          | 4           | 8.0359         | -1366.569041        |
| Cr-Cr       | 4          | -4          | -0.005         | -1366.571863        |
| 3layer      | <b>-4</b>  | <b>4</b>    | <b>0.0039</b>  | <b>-1366.571970</b> |
|             | -4         | -4          | -8.0402        | -1366.568700        |
|             | 4          | 4           | 7.9547         | -1381.592246        |
| Cr-Cr-CO    | <b>-4</b>  | <b>4</b>    | <b>-0.1026</b> | <b>-1381.593757</b> |
| 3layer      | 4          | -4          | 0.1042         | -1381.593707        |
|             | -4         | -4          | -7.9589        | -1381.592177        |
|             | 4          | 4           | 3.8814         | -1395.853433        |
| CO-Cr-Cr-CO | 4          | -4          | -0.0151        | -1396.608243        |
| 3layer      | <b>-4</b>  | <b>4</b>    | <b>0.0147</b>  | <b>-1396.608277</b> |
|             | -4         | -4          | -7.8532        | -1396.608262        |
|             | 1.1        | -1.1        | 0.9985         | -893.3641402        |
|             | 1.5        | -1.5        | 0.0111         | -892.7175691        |
| Co-Co       | 1          | -1          | 0              | -893.9793511        |
| 2layer      | -1         | 1           | 2.0002         | -893.8999816        |
|             | <b>-1</b>  | <b>-1</b>   | <b>1.9976</b>  | <b>-893.9798359</b> |
|             | 1          | 1           | 1.6763         | -909.2876567        |
| Co-Co-CO    | 1          | -1          | -1.6774        | -909.2879696        |
| 2layer      | <b>-1</b>  | <b>1</b>    | <b>1.6798</b>  | <b>-909.2881226</b> |
|             | -1         | -1          | -0.9404        | -908.6947625        |
|             | <b>1</b>   | <b>1</b>    | <b>-1.5684</b> | <b>-924.6178576</b> |
| CO-Co-Co-CO | 1          | -1          | 0              | -924.5998886        |
| 2layer      | -1         | 1           | 0.0129         | -924.6011992        |
|             | -1         | -1          | 1.5680         | -924.6172661        |
|             | 1          | 1           | -0.9680        | -1359.841443        |
|             | 0          | -1          | -1.9878        | -1360.476545        |
| Co-Co       | <b>1</b>   | <b>-1</b>   | <b>2.0046</b>  | <b>-1360.540163</b> |
| 3layer      | 1.2        | -1.2        | 1.0361         | -1359.915254        |

|             |             |             |                |                     |
|-------------|-------------|-------------|----------------|---------------------|
|             | -1          | 1           | -1.9877        | -1360.476531        |
|             | -1          | -1          | 0.0878         | -1359.307490        |
|             | 1           | 1           | 0.0001         | -1375.027983        |
| Co-Co-CO    | -1          | 1           | 0.3991         | -1375.908317        |
| 3layer      | 1           | -1          | -0.9782        | -1375.593745        |
|             | <b>-1</b>   | <b>-1</b>   | <b>0.3990</b>  | <b>-1375.908785</b> |
|             | 1           | 1.5         | 1.8000         | -1375.156497        |
|             | 1           | 1           | 1.3993         | -1391.262351        |
| CO-Co-Co-CO | 1           | -1          | -1.3886        | -1391.259226        |
| 3layer      | -1          | 1           | 0              | -1390.730129        |
|             | <b>-1</b>   | <b>-1</b>   | <b>0.0001</b>  | <b>-1391.277037</b> |
|             | 3           | 3           | 6.0160         | -898.5339520        |
| Mn-Mn       | 3.5         | 3.5         | 5.9879         | -897.7734636        |
| 2layer      | 3           | -3          | 0.0023         | -896.2499750        |
|             | <b>3.5</b>  | <b>-3.5</b> | <b>0</b>       | <b>-898.5370012</b> |
|             | 3.5         | 3.5         | 4.0022         | -913.5459042        |
| Mn-Mn-CO    | 3.5         | -3.5        | -1.9964        | -913.5460834        |
| 2layer      | <b>-1.5</b> | <b>3.5</b>  | <b>1.9972</b>  | <b>-913.5463341</b> |
|             | 3.5         | -3.5        | 2.0197         | -928.5425653        |
| CO-Mn-Mn-CO | 3.5         | 3.5         | -1.1178        | -927.7330674        |
| 2layer      | -3.5        | -3.5        | 2.0198         | -928.5425353        |
|             | 3           | 3           | 0              | -928.5439699        |
|             | <b>3</b>    | <b>-3</b>   | <b>0</b>       | <b>-928.5440266</b> |
|             | 3.5         | 3.5         | 6.0289         | -1365.072813        |
| Mn-Mn       | <b>3.5</b>  | <b>-3.5</b> | <b>-0.0009</b> | <b>-1365.075321</b> |
| 3layer      | 3           | 3           | 6.0287         | -1365.073846        |
|             | -3.5        | -3.5        | -6.0284        | -1365.074350        |
|             | 3.5         | 3.5         | 2.0840         | -1378.984596        |
| Mn-Mn-CO    | -3.5        | 3.5         | 4.0632         | -1380.106858        |
| 3layer      | <b>3.5</b>  | <b>-3.5</b> | <b>-1.9346</b> | <b>-1380.108248</b> |
|             | -3.5        | -3.5        | -4.0624        | -1380.107831        |
|             | 3.5         | 3.5         | -2.1122        | -1395.133659        |
| CO-Mn-Mn-CO | 3.5         | -3.5        | -0.0027        | -1395.134337        |
| 3layer      | <b>3</b>    | <b>3</b>    | <b>-0.0018</b> | <b>-1395.135813</b> |
|             | 3           | 3           | 5.7521         | -897.8650413        |
| V-V         | <b>3</b>    | <b>-3</b>   | <b>0.0003</b>  | <b>-897.9045924</b> |
| 2layer      | -3          | 3           | -0.0012        | -897.9038882        |
|             | -3          | -3          | -5.7506        | -897.8650338        |
|             | 3           | 3           | 5.7275         | -913.5199510        |
| V-V-CO      | <b>3</b>    | <b>-3</b>   | <b>0.1848</b>  | <b>-913.5622867</b> |
| 2layer      | 2.5         | 3           | 5.7242         | -913.5199065        |

|             |           |             |                |                     |
|-------------|-----------|-------------|----------------|---------------------|
|             | -2.5      | 3           | -0.1901        | -913.5621289        |
|             | -2.5      | -3          | -3.9743        | -913.0553224        |
|             | 3         | 3           | 4.0154         | -928.4896404        |
| CO-V-V-CO   | <b>3</b>  | <b>-3</b>   | <b>-0.0001</b> | <b>-929.1230387</b> |
| 2layer      | 2.5       | 2.5         | 4.0303         | -928.6110261        |
|             | -3        | -3          | -6.0464        | -929.1226994        |
|             | -2.5      | 2.5         | 2.0036         | -928.6098769        |
|             | 3         | 3           | 5.5556         | -1364.240068        |
| V-V         | 3         | -3          | 3.5512         | -1363.503288        |
| 3layer      | -3        | 3           | -0.0001        | -1364.227110        |
|             | <b>-3</b> | <b>-3</b>   | <b>-5.5555</b> | <b>-1364.240228</b> |
|             | 3         | 3           | 5.7434         | -1380.037894        |
| V-V-CO      | -3        | 3           | -0.3331        | -1380.039555        |
| 3layer      | <b>3</b>  | <b>-3</b>   | <b>0.3345</b>  | <b>-1380.039862</b> |
|             | -3        | -3          | -3.7019        | -1379.523333        |
|             | 3         | 3           | 6.1743         | -1395.723809        |
| CO-V-V-CO   | 3         | -3          | 0.0043         | -1395.724166        |
| 3layer      | -3        | 3           | -2.0856        | -1395.208593        |
|             | <b>-3</b> | <b>-3</b>   | <b>-6.1755</b> | <b>-1395.724503</b> |
|             | 4         | 3.5         | 3.0032         | -897.5354466        |
| Cr-Mn       | <b>4</b>  | <b>-3.5</b> | <b>0.9986</b>  | <b>-899.2517859</b> |
| 2layer      | -4        | 3.5         | -0.9973        | -898.8829665        |
|             | -4        | -3.5        | 0.9987         | -899.2516553        |
|             | 4         | 3.5         | -0.9987        | -914.2683799        |
| CO-Cr-Mn    | <b>4</b>  | <b>-3.5</b> | <b>0.9986</b>  | <b>-914.2684388</b> |
| 2layer      | -4        | 3.5         | -0.9986        | -914.2683724        |
|             | -4        | -3.5        | 0.9986         | -914.2685358        |
|             | 4         | 3.5         | 5.0211         | -914.2726398        |
|             | 4         | -3.5        | 5.0205         | -914.2727316        |
|             | 4         | -2          | 2.9662         | -914.2702436        |
| Cr-Mn-CO    | <b>4</b>  | <b>2</b>    | <b>5.0203</b>  | <b>-914.2729830</b> |
| 2layer      | 4.5       | -4          | 5.0202         | -914.2729059        |
|             | -4        | 3.5         | -5.0212        | -914.2726342        |
|             | 4         | -1.5        | 2.9665         | -914.2701955        |
|             | 3.5       | 1.5         | 2.9678         | -914.2699039        |
|             | -4        | -3.5        | -2.9659        | -914.2701560        |
|             | 4         | 3.5         | 5.0258         | -929.2754949        |
| CO-Cr-Mn-CO | 4         | -3.5        | 5.0259         | -929.2756977        |
| 2layer      | -4        | 3.5         | -2.9815        | -929.2736816        |
|             | <b>-4</b> | <b>-3.5</b> | <b>-5.0259</b> | <b>-929.2757286</b> |
|             | 4         | 3.5         | 0.9538         | -1362.907122        |
| Cr-Mn       | 4         | -3.5        | -3.0636        | -1364.073182        |

|             |            |             |               |                     |
|-------------|------------|-------------|---------------|---------------------|
| 3layer      | -4         | 3.5         | 3.0402        | -1364.073289        |
|             | <b>-4</b>  | <b>-3.5</b> | <b>1.0179</b> | <b>-1365.825386</b> |
|             | 4          | 3.5         | -0.9344       | -1380.845281        |
| CO-Cr-Mn    | <b>4</b>   | <b>-3</b>   | <b>0.9098</b> | <b>-1380.845711</b> |
| 3layer      | 4          | -3.5        | 0.9319        | -1380.845211        |
|             | -4         | -3.5        | -0.9161       | -1380.630067        |
|             | <b>4</b>   | <b>3.5</b>  | <b>2.9493</b> | <b>-1380.865164</b> |
| Cr-Mn-CO    | 4          | -3.5        | 5.1271        | -1380.864056        |
| 3layer      | -4         | 3.5         | -5.1266       | -1380.864043        |
|             | -4         | -3.5        | -2.9488       | -1380.864751        |
|             | <b>4</b>   | <b>3.5</b>  | <b>2.8914</b> | <b>-1395.880137</b> |
|             | 3.6        | 1.3         | 5.0540        | -1395.878833        |
| CO-Cr-Mn-CO | 4          | 2           | -5.0549       | -1395.877839        |
| 3layer      | 4          | 2.5         | 5.0524        | -1395.877812        |
|             | 4          | -3.5        | 5.0582        | -1395.879061        |
|             | -4         | 3.5         | -5.0598       | -1395.879072        |
|             | -4         | -3.5        | -2.8864       | -1395.878870        |
| <b>L</b>    |            |             |               |                     |
|             | 4          | 3.5         | 3             | -1684.797769        |
| Cr-Mn       | 4          | -3.5        | 1             | -1686.568992        |
| L-1         | <b>-4</b>  | <b>3.5</b>  | <b>-1</b>     | <b>-1686.569152</b> |
|             | -4         | -3.5        | -7            | -1686.569129        |
|             | 4          | 3.5         | 1             | -1700.525122        |
|             | 4          | -3.5        | -1            | -1701.793222        |
| CO-Cr-Mn    | -4         | 3.5         | 1             | -1701.794142        |
| L-1         | 4.5        | 3.5         | 7             | -1701.794166        |
|             | <b>4.5</b> | <b>-3.5</b> | <b>-1</b>     | <b>-1701.794179</b> |
|             | -4         | -3.5        | -1            | -1700.526522        |
|             | 4          | 3.5         | 5             | -1701.335615        |
| Cr-Mn-CO    | 4          | -1.5        | 3             | -1701.874357        |
| L-1         | -4         | 3.5         | -3            | -1701.872237        |
|             | <b>-4</b>  | <b>3</b>    | <b>-3</b>     | <b>-1701.874540</b> |
|             | -4         | 2           | -3            | -1701.873893        |
|             | <b>4</b>   | <b>3.5</b>  | <b>5</b>      | <b>-1716.945804</b> |
| CO-Cr-Mn-CO | 4          | -3.5        | 3             | -1716.943032        |
| L-1         | -4         | 3.5         | -3            | -1716.945588        |
|             | <b>4</b>   | <b>3.5</b>  | <b>-1</b>     | <b>-1686.580506</b> |
|             | 4          | -3.5        | 1             | -1686.580503        |
| Cr-Mn       | -4         | 3.5         | -1            | -1686.580451        |
| L-2         | 4          | 4           | 7.0029        | -1686.578666        |
|             | -4         | 4           | -0.9996       | -1686.580425        |
|             | -4         | -3.5        | -1            | -1685.312626        |

|             |           |             |           |                     |
|-------------|-----------|-------------|-----------|---------------------|
|             | 4         | 3.5         | -1        | -1701.776098        |
| CO-Cr-Mn    | <b>4</b>  | <b>-3.5</b> | <b>-1</b> | <b>-1701.776754</b> |
| L-2         | -4        | 3.5         | 1         | -1701.776710        |
|             | -4        | -3.5        | -7        | -1701.775969        |
|             | 4         | 3.5         | 5         | -1701.861177        |
|             | 4         | -3.5        | 3         | -1701.861703        |
| Cr-Mn-CO    | <b>-4</b> | <b>3.5</b>  | <b>-3</b> | <b>-1701.862228</b> |
| L-2         | 4         | 1.5         | 5.0007    | -1701.862211        |
|             | 4         | -1.5        | 2.9998    | -1701.862195        |
|             | -4        | 1.5         | -3        | -1701.862225        |
|             | 4         | 3.5         | 3         | -1716.934786        |
|             | <b>4</b>  | <b>3</b>    | <b>5</b>  | <b>-1716.935961</b> |
| CO-Cr-Mn-CO | 4         | 2           | 1         | -1716.273966        |
| L-2         | 4         | -2          | 3         | -1716.935922        |
|             | -4        | -3.5        | -5        | -1716.933323        |
|             | 4         | 3.5         | -1        | -1686.221284        |
|             | 4         | -3.5        | 1         | -1686.572657        |
|             | -4        | 2           | -1        | -1686.572886        |
| Cr-Mn       | -4        | 3           | 1         | -1685.304558        |
| L-3         | -4        | 3.5         | -1        | -1686.572238        |
|             | 4         | 4           | 7.0007    | -1686.572795        |
|             | <b>-4</b> | <b>4</b>    | <b>-1</b> | <b>-1686.572914</b> |
|             | -4        | -4          | -5        | -1685.295296        |
|             | -4        | -3.5        | -3        | -1684.799441        |
|             | <b>4</b>  | <b>3.5</b>  | <b>-1</b> | <b>-1701.766826</b> |
|             | 4         | -3.5        | -1        | -1701.763828        |
|             | -4        | 3.5         | 1         | -1701.763913        |
| CO-Cr-Mn    | 4         | 4           | 7         | -1701.766812        |
| L-3         | -4        | 4           | 1.0001    | -1701.766818        |
|             | -4        | -4          | -7.0006   | -1701.766644        |
|             | -4        | -3.5        | -5        | -1700.495381        |
|             | 4         | 3           | 5         | -1701.855709        |
| Cr-Mn-CO    | 4         | -3          | 3         | -1701.858934        |
| L-3         | 4         | -3.5        | 3         | -1701.858958        |
|             | -4        | 3           | -3        | -1701.858748        |
|             | <b>-4</b> | <b>3.5</b>  | <b>-3</b> | <b>-1701.859126</b> |
|             | <b>4</b>  | <b>3.5</b>  | <b>5</b>  | <b>-1716.941999</b> |
| CO-Cr-Mn-CO | 4         | -3.5        | 1         | -1716.851402        |
| L-3         | -4        | -3.5        | -3        | -1716.940988        |
|             | -4        | -3.5        | -3        | -1716.940984        |
|             | 4         | 3.5         | -1        | -1686.571430        |
|             | 4         | -3.5        | 1         | -1686.571532        |



|             |             |             |           |                     |
|-------------|-------------|-------------|-----------|---------------------|
| Cr-Mn       | -4          | 3.5         | -1        | -1686.571534        |
| L-4         | <b>-4</b>   | <b>4</b>    | <b>-1</b> | <b>-1686.571558</b> |
|             | -4          | -4          | -7.0007   | -1686.571511        |
|             | -4          | -3.5        | -1        | -1685.304777        |
|             | <b>4</b>    | <b>3.5</b>  | <b>-1</b> | <b>-1701.767414</b> |
|             | 4           | -3.5        | -1        | -1701.765517        |
| CO-Cr-Mn    | -4          | 3.5         | 1         | -1701.767413        |
| L-4         | 4           | 4           | 7         | -1701.767400        |
|             | -4          | 4           | 0.9999    | -1701.767406        |
|             | -4          | -3.5        | -2.9679   | -1699.638179        |
| Cr-Mn-CO    | 4           | 3.5         | 5         | -1701.867018        |
| L-4         | 4           | -3.5        | 3         | -1701.866482        |
|             | <b>-4</b>   | <b>3.5</b>  | <b>-3</b> | <b>-1701.867108</b> |
|             | <b>4</b>    | <b>3.5</b>  | <b>5</b>  | <b>-1716.933879</b> |
| CO-Cr-Mn-CO | 4           | -3.5        | 3         | -1716.933188        |
| L-4         | -4          | 3.5         | -3        | -1716.933161        |
|             | -4          | -3.5        | -5        | -1716.933183        |
| Mn-Mn       | 3.5         | 3.5         | 6         | -1685.798602        |
| L-1         | <b>3.5</b>  | <b>-3.5</b> | <b>0</b>  | <b>-1685.798855</b> |
|             | -3.5        | -3.5        | -6        | -1685.798491        |
|             | 3.5         | 3.5         | 2         | -1701.091961        |
| Mn-Mn-CO    | <b>3.5</b>  | <b>-3.5</b> | <b>2</b>  | <b>-1701.093001</b> |
| L-1         | 3.5         | 1.5         | 4         | -1700.765545        |
|             | -3.5        | 1.5         | -2        | -1701.091957        |
|             | 3.5         | 2           | 4.5       | -1700.948193        |
|             | -3.5        | -1.5        | -2        | -1701.091956        |
|             | <b>3.5</b>  | <b>3.5</b>  | <b>2</b>  | <b>-1716.354479</b> |
| CO-Mn-Mn-CO | 2           | -2          | 0         | -1715.812488        |
| L-1         | -2          | 2           | 0         | -1715.270127        |
|             | 1.5         | -1.5        | 0         | -1716.354438        |
|             | -1.5        | 1.5         | -2        | -1715.700775        |
| Mn-Mn       | 3.5         | 3.5         | 6         | -1685.801870        |
| L-2         | 3.5         | -3.5        | 0         | -1685.142473        |
|             | <b>-3.5</b> | <b>3.5</b>  | <b>0</b>  | <b>-1685.802048</b> |
|             | <b>3.5</b>  | <b>3.5</b>  | <b>2</b>  | <b>-1701.076015</b> |
| Mn-Mn-CO    | 3.5         | -3.5        | 2         | -1701.074991        |
| L-2         | -3.5        | 3.5         | -2        | -1701.075061        |
|             | -3.5        | -3.5        | -3.5097   | -1700.276397        |
|             | <b>3.5</b>  | <b>3.5</b>  | <b>2</b>  | <b>-1716.340367</b> |
| CO-Mn-Mn-CO | 3.5         | -3.5        | -2        | -1716.262848        |
| L-2         | 1.5         | -1.5        | 0         | -1716.340358        |

|                               | -1.5     | 1.5       | 0              | -1715.798728        |
|-------------------------------|----------|-----------|----------------|---------------------|
| In the environment full of CO |          |           |                |                     |
|                               | 3        | 3         | 5.9998         | -1626.962264        |
| V-V-2CO                       | <b>3</b> | <b>-3</b> | <b>-0.0001</b> | <b>-1626.970263</b> |
| t=3.0 ps                      | -3       | 3         | 0.0001         | -1626.970263        |
|                               | -3       | -3        | -5.9999        | -1626.962264        |
|                               | 3        | 3         | 4.0001         | -1625.468617        |
| t=4.0 ps                      | <b>3</b> | <b>-3</b> | <b>0.0001</b>  | <b>-1625.665164</b> |
|                               | -3       | -3        | -5.9998        | -1625.662652        |
|                               | 3        | 3         | 5.9998         | -1628.005521        |
| t=5.0 ps                      | <b>3</b> | <b>-3</b> | <b>-0.0002</b> | <b>-1628.008728</b> |
|                               | 3        | 3         | 5.9997         | -1627.687626        |
| t=6.0 ps                      | <b>3</b> | <b>-3</b> | <b>-0.0001</b> | <b>-1627.695955</b> |
|                               | 3        | 3         | 6              | -1626.007678        |
| t=7.0 ps                      | <b>3</b> | <b>-3</b> | <b>-0.0009</b> | <b>-1626.025676</b> |
|                               | -3       | -3        | -4.0001        | -1625.780788        |
|                               | 3        | 3         | 5.9998         | -1626.470227        |
| t=8.0 ps                      | <b>3</b> | <b>-3</b> | <b>-0.0001</b> | <b>-1626.474790</b> |
|                               | 3        | 3         | 5.9998         | -1627.761818        |
| t=9.0 ps                      | <b>3</b> | <b>-3</b> | <b>-0.0001</b> | <b>-1627.768244</b> |
|                               | 3        | 3         | 5.9998         | -1626.846927        |
| t=9.5 ps                      | <b>3</b> | <b>-3</b> | <b>-0.0002</b> | <b>-1626.855003</b> |
|                               | 3        | 3         | 5.9999         | -1627.281730        |
| t=10.0 ps                     | <b>3</b> | <b>-3</b> | <b>-0.0004</b> | <b>-1627.285193</b> |
